1 **CD8<sup>+</sup> T cell immunity is compromised by anti-CD20 treatment and rescued by**  
2 **IL-17A**

3

4 Running title: IL-17A rescued deficient CD8<sup>+</sup> T cell response

5

6 Facundo Fiocca Vernengo<sup>a,b\*</sup>, Cristian G. Beccaria<sup>a,b\*</sup>, Cintia L. Araujo Furlan<sup>a,b</sup>, Jimena Tosello  
7 Boari<sup>a,b\*</sup>, Laura Almada<sup>a,b</sup>, Melisa Gorosito Serrán<sup>a,b</sup>, Yamila Gazzoni<sup>a,b</sup>, Carolina L. Montes<sup>a,b</sup>, Eva  
8 V. Acosta Rodríguez<sup>a,b</sup> and Adriana Gruppi<sup>a,b#</sup>

9

10 <sup>a</sup>Departamento de Bioquímica Clínica, Facultad de Ciencias Químicas (FCQ), Universidad Nacional  
11 de Córdoba (UNC), Córdoba, X5000HUA, Argentina

12 <sup>b</sup>Centro de Investigaciones en Bioquímica Clínica e Inmunología (CIBICI - CONICET), Córdoba,  
13 X5000HUA, Argentina.

14

15 **Correspondence:**

16 Dr Adriana Gruppi. [agruppi@fcq.unc.edu.ar](mailto:agruppi@fcq.unc.edu.ar)

17

18 \*Present address:

19 Facundo Fiocca Vernengo: Dept. of Internal Medicine - Infectious Diseases and Respiratory  
20 Medicine. Charité Universitätsmedizin Berlin, Berlin, Germany.

21 Cristian G. Beccaria: Division of Immunology, Transplantation and Infectious Diseases and  
22 Experimental Imaging Center, IRCCS, San Raffaele Scientific Institute, Milán, Italy.

23 Jimena Tosello Boari: SiRIC TransImm “Translational Immunotherapy Team”, Translational  
24 Research Department, Research Center, Institut Curie, Paris, France.

25 **Abstract**

26 Treatment with anti-CD20, used in many diseases in which B cells play a pathogenic role, has been  
27 associated with susceptibility to intracellular infections. Here, we studied the effect of anti-CD20  
28 injection on CD8<sup>+</sup> T cell immunity using an experimental model of *Trypanosoma cruzi* infection, in  
29 which CD8<sup>+</sup> T cells play a pivotal role. C57BL/6 mice were treated with anti-CD20 for B cell  
30 depletion prior to *T. cruzi* infection. Infected anti-CD20-treated mice exhibited a CD8<sup>+</sup> T cell  
31 response with a conserved expansion phase followed by an early contraction, resulting in a strong  
32 reduction in total and parasite-specific CD8<sup>+</sup> T cells at 20 days postinfection. Anti-CD20 injection  
33 decreased the number of effector and memory CD8<sup>+</sup> T cells and reduced the frequency of  
34 proliferating and cytokine producing CD8<sup>+</sup> T cells. Accordingly, infected anti-CD20-treated mice  
35 presented a lower cytotoxicity of *T. cruzi* peptide-pulsed target cells *in vivo*. All of these alterations  
36 in CD8<sup>+</sup> T cell immunity were associated with increased tissue parasitism. Anti-CD20 injection also  
37 dampened an established CD8<sup>+</sup> T cell response, indicating that B cells were involved in the  
38 maintenance rather than the induction of CD8<sup>+</sup> T cell immunity. Anti-CD20 injection also resulted in  
39 a marked reduction in the frequency of IL-6- and IL-17A-producing cells, and only rIL-17A injection  
40 partially restored the CD8<sup>+</sup> T cell response in infected anti-CD20-treated mice. Thus, anti-CD20  
41 reduced CD8<sup>+</sup> T cell immunity, and IL-17A is a candidate for rescuing deficient responses either  
42 directly or indirectly.

43

44 **Importance**

45 Monoclonal antibody targeting the CD20 antigen on B cells is used to treat the majority of Non-  
46 Hodgkin lymphoma patients and some autoimmune disorders. This therapy generates adverse effects,  
47 notably opportunistic infections and activation of viruses from latency. Here, using the infection  
48 murine model with the intracellular parasite *Trypanosoma cruzi*, we report that anti-CD20 treatment  
49 not only affects B cell response but also CD8<sup>+</sup> T cells, the most important immune effectors involved  
50 in control of intracellular pathogens. Anti-CD20 treatment, directly or indirectly, affects cytotoxic T  
51 cell number and function and this deficient response was rescued by the cytokine IL-17A. The  
52 identification of IL-17A as the cytokine capable of reversing the poor response of CD8<sup>+</sup> T cells  
53 provide information about a potential therapeutic treatment aimed at enhancing defective immunity  
54 induced by B cell depletion.

## 55 **Introduction**

56

57 The anti-CD20 monoclonal antibody (mAb) has revolutionized the treatment of B-cell malignancies.  
58 This antibody, which depletes B cells, has been a success for the treatment of non-Hodgkin's  
59 lymphoma (1), chronic lymphocytic leukemia (2) and autoimmune disorders (3) and has also  
60 provided information about the antibody-independent role of B cells (4, 5).

61 B cells are known to produce antibodies (Abs), but they also take up, process and present soluble  
62 antigens (Ags) and secrete cytokines. B cells were shown to produce IL-10 and to have regulatory  
63 functions in autoimmune models of colitis, experimental autoimmune encephalitis (EAE) and  
64 arthritis (6-8). However, B cells can produce cytokines other than IL-10. *Salmonella* triggers IL-35  
65 and IL-10 production by B cells (9, 10), and we demonstrated that *Trypanosoma cruzi* infection leads  
66 B cells to produce IL-17A (11). In addition, B cells can produce TGF- $\beta$ 1, and through this  
67 cytokine, they downregulate the function of antigen presenting cells and encephalitogenic Th1/17  
68 responses in a murine model of multiple sclerosis (12). Therefore, under particular  
69 microenvironmental conditions, namely, through different activation and differentiation signals, B  
70 cells are able to produce different cytokines (13).

71 The role of B cells in conditioning CD8<sup>+</sup> T cell responses has been reported in autoimmunity (14), in  
72 bacterial (15) and viral (16, 17) infections and in cancer (18). B cells have been shown to shape the  
73 profile of CD8<sup>+</sup> T cells, but the mediators involved in that process have not been completely  
74 elucidated.

75 In Chagas disease, which is caused by the protozoan parasite *T. cruzi*, CD8<sup>+</sup> T cells capable of  
76 recognizing *T. cruzi*-infected cells are essential for control of the infection. Deleting or inhibiting  
77 CD8<sup>+</sup> T cells results in uncontrollable parasite load early in infection and an exacerbation of infection  
78 in chronically infected hosts (19, 20). Strategies that generate a productive specific CD8<sup>+</sup> T cell  
79 response will lead to increased host protection, a reduction in symptoms, and a decrease in disease  
80 transmission (21, 22). During *T. cruzi* infection B cells undergo polyclonal expansion (23), IL-17A  
81 production (11) and also regulate CD4<sup>+</sup> T cell response (24). Considering these characteristics, and  
82 the key functions of CD8<sup>+</sup> T cells in controlling parasite replication, we used this experimental model  
83 to investigate how B cell depletion by anti-CD20 injection conditions CD8<sup>+</sup> T cell immunity.

## 84 **Materials and Methods**

85

### 86 *Mice, parasites and experimental infection*

87 All animal experiments were approved by and conducted in accordance with the guidelines of the  
88 Institutional Animal Care and Use Committee of FCQ-UNC (Res. No. 854/18 CICUAL-FCQ).  
89 Female and age-matched (2-3-month-old) mice were used. C57BL/6 wild-type (WT; JAX:000664)  
90 and  $\mu$ MT mice (B6.129S2-Ighmtm1Cgn/J; JAX:002288) were obtained from The Jackson  
91 Laboratories (USA) and housed in our animal facility. Mice were inoculated intraperitoneally (ip)  
92 with  $5 \times 10^3$  trypomastigotes of *T. cruzi* (Tulahuén strain)/0.2 ml PBS (25).

93

### 94 *Anti-CD20 injection*

95 Mice were injected ip with 50  $\mu$ g of anti-CD20 mAb (Genentech, clone 5D2) or with mouse IgG2a  
96 control isotype (BioXcell, clone C1.18.4.) 8 days before infection with *T. cruzi* and studied at  
97 different days postinfection (dpi). In an alternative setting, mice were injected with anti-CD20 at 12  
98 dpi and studied at 20 dpi.

99

### 100 *Quantification of parasite DNA*

101 Genomic DNA was purified from 50  $\mu$ g of tissue using TRIzol Reagent (Life Technologies)  
102 following the manufacturer's instructions. Satellite DNA from *T. cruzi* (GenBank AY520036) was  
103 quantified by RT-PCR as reported (24).

104

### 105 *Cell preparation*

106 Blood, spleen and liver-infiltrating cells were obtained as described (25).

107

### 108 *Antibodies and flow cytometry*

109 Cell suspensions were washed in PBS and incubated with LIVE/DEAD Fixable Cell Dead Stain  
110 (Thermo Fisher Scientific) for 15 min at room temperature. Next, the cells were washed in ice-cold  
111 FACS buffer (PBS-2% FBS) and incubated with fluorochrome-labeled Abs for 20 min at 4°C.  
112 Different combinations of the following anti-mouse Abs (Thermo Fisher Scientific, Biolegend) were  
113 used: FITC-labeled anti-CD8 (53-6.7) and anti-CD44 (IM7); PE-labeled anti-CD127 (A7R34);  
114 PerCp-Cy5.5-labeled anti-CD19 (eBio1D3), anti-CD3 (145-2C11), and anti-CD62L (MEL-14);  
115 PECy7-labeled anti-B220 (RA3-6B2), anti-KLRG1 (2F1), Alexa Fluor 647-labeled anti-CD8 (53-  
116 6.7); and APC-eFluor 780-labeled anti-CD8 (53-6.7). *T. cruzi*-specific CD8<sup>+</sup> T cells were evaluated  
117 using APC-labeled tetramer of H-2K(b) molecules loaded with *T. cruzi* trans-sialidase



118 immunodominant ANYKFTLV (Tskb20) peptide (NIH Tetramer Core Facility) (26). After staining,  
119 cells were washed and acquired in a FACSCanto II (BD Biosciences) and analyzed with FlowJo V10  
120 software (TreesStar). Blood was directly incubated with the abovementioned antibodies, and  
121 erythrocytes were lysed with a 0.87% NH<sub>4</sub>Cl buffer prior to acquisition. Transcription factors (TF)  
122 were detected after cell fixation and permeabilization with a Foxp3 Staining Buffer Set according to  
123 the manufacturer's protocol (Thermo Fisher Scientific) using the following antibodies: PECy7-  
124 labeled anti-Tbet (4B10) and PE-labeled anti-Ki67 (SolA15). For intracellular cytokine staining,  
125 cells were cultured for 5 h with 50 ng/ml PMA (phorbol 12-myristate 13-acetate) (Sigma), 1 µg/ml  
126 ionomycin (Sigma), brefeldin A (Thermo Fisher Scientific) and monensin (Thermo Fisher  
127 Scientific). Cells were fixed and permeabilized with BD Cytofix/Cytoperm and Perm/Wash (BD  
128 Biosciences) according to the manufacturer's instructions. Cells were incubated with surface-staining  
129 antibodies and PE-labeled anti-IL-17A (eBio17B7), anti-IL-6 (MP5-20F3), APC-labeled anti-IFN $\gamma$   
130 (XMG1.2), and anti-IL-10 (JES5-16E3).

131

### 132 *Immunofluorescence of Spleen*

133 Spleens were collected and frozen over liquid nitrogen. Frozen sections 7 µm in thickness were cut,  
134 fixed for 10 min in cold acetone, left to dry at 25 °C and stored at -80 °C until use. Slides were  
135 hydrated in TRIS buffer and blocked for 30 min at 25 °C with 10% normal mouse serum in TRIS  
136 buffer. After blocking, slides were incubated for 50 min at 25 °C with different combinations of the  
137 following anti-mouse Abs (Thermo Fisher Scientific, Biolegend, BD Biosciences): Alexa Fluor 488-  
138 labeled anti-CD3 (HM3420) and anti-CD8 (53-6.7), PE-labeled anti-B220 (RA3-6B2) and anti-IL-  
139 17A (eBio17B7), APC-labeled anti-CD138 (281-2). Slices were mounted with FluorSave (Merck  
140 Millipore). For immunofluorescent staining of intracellular IL-17A, tissue sections were prepared,  
141 fixed, permeabilized and blocked using the Image-iT Fixation/Permeabilization kit (Invitrogen,  
142 R37602) prior to IL-17A staining. Images were collected with an Olympus microscope (FV1000)  
143 and processed/analyzed using ImageJ64 1.52e (National Institutes of Health, USA). For B220+ area  
144 measurements and IL-17A expression analysis, we segmented cell objects by converting images into  
145 a binary mask using the default setting, after which, standard built-in functions were used to segment  
146 out cell objects.

147

### 148 *Apoptosis*

149 Mitochondrial depolarization was measured by FACS using 50 nM TMRE (Thermo Fisher  
150 Scientific) as described (27). The splenic cell suspensions were stained with anti-mouse CD8 and

151 Tskb20/Kb tetramer prior to staining with TMRE. Non-apoptotic cells were defined as TMRE<sup>hi</sup>  
152 within live single cells.

153

#### 154 *CD8<sup>+</sup> T cell effector function in vitro*

155 CD8<sup>+</sup> T cell effector function was determined *in vitro* by CD107a mobilization and cytokine  
156 production, as previously reported (28). Briefly, cell suspensions were cultured for 5 h with medium,  
157 5 µg/ml TSKB20 (ANYKFTLV) peptide (Genscript Inc.) or 50 ng/mL PMA plus 500 ng/ml  
158 ionomycin (Sigma) in the presence of monensin (Thermo Fisher Scientific) and a PE-labeled anti-  
159 CD107a mAb (Thermo Fisher Scientific, eBio1D4B). After culture, the cells were stained with a  
160 PEcy7-labeled anti-CD8 mAb, fixed and permeabilized with BD Cytotfix/Cytoperm and Perm/Wash  
161 (BD Biosciences) according to the manufacturer's instructions. After permeabilization, the cells were  
162 incubated for 30 min at RT with the following anti-mouse Abs (Thermo Fisher Scientific): APC-  
163 labeled anti-IFN $\gamma$  (XMG1.2) and PerCp-Cy5.5-labeled anti-TNF (MP6-XT22).

164

#### 165 *In vivo cytotoxicity assay*

166 Spleen mononuclear cell suspensions from  $\mu$ MT mice were pulsed for 1 h with 1 µg/ml of the  
167 Tskb20, Tskb18 or PA8 (VNHRFTLV) peptides (target cells). In this setting,  $\mu$ MT mice, which lack  
168 mature B cells, were used to avoid circulating anti-CD20 killing of the transferred cells. Unpulsed  
169 splenocytes were used as a control. Target and control cells were washed and stained with 2 µM or  
170 20 µM of CFSE and 5 µM of the Cell Proliferation Dye eFluor<sup>TM</sup>670 (Thermo Fisher Scientific).  
171 After staining, cells were mixed in equal proportions and injected iv into uninfected and infected  
172 control and anti-CD20-treated mice at 20 dpi. Mice were sacrificed 5 h later, and the frequency of  
173 injected cells in the spleen was evaluated by flow cytometry. The percentage of specific lysis was  
174 calculated between the unloaded and each of the different peptide-loaded cells independently as  
175 follows:  $100 - [((\% \text{ peptide pulsed in infected} / \% \text{ unpulsed in infected}) / (\% \text{ peptide pulsed in}$   
176  $\text{uninfected} / \% \text{ unpulsed in uninfected})) \times 100]$ .

177

#### 178 *Cytokine quantification*

179 Serum IL-6 and IL-17A concentrations were assessed by ELISA according to the manufacturer's  
180 instructions (Thermo Fisher Scientific).

181

#### 182 *In vivo IL-6 and IL-17A treatment*

183 Anti-CD20-treated mice were administered with recombinant IL-6 or IL-17 taking into account their  
184 production kinetics (Fig. 5A). Either IL-6 (200ng/dose) (29) or IL-17A (500ng/dose) (30)  
185 (Shenandoah – EEUU) were injected intraperitoneally at 12, 14, 16 and 18 dpi. Anti-CD20-treated  
186 mice injected with PBS were used as the non-cytokine-treated control group.

187

#### 188 *Statistics*

189 The statistical significance of comparisons of mean values was assessed as indicated by a two-tailed  
190 Student's t test and two-way ANOVA followed by Bonferroni's posttest using GraphPad software.

191 **Results**

192

193 *Anti-CD20 treatment decreased the number of CD8<sup>+</sup> T cells and increased tissue parasitism*

194 As reported by Tosello Boari et al (28), we determined by flow cytometry that the frequency and  
195 number of CD8<sup>+</sup> T cells increased during *T. cruzi* infection. CD8<sup>+</sup> T cell expansion peaked at 20 dpi  
196 and was followed by the contraction phase of the response (Fig. 1A, control mice). Anti-CD20  
197 injection, 8 days prior to the infection, significantly decreased splenic B cell numbers (Fig. S1 A-C),  
198 which persisted at very low levels until 20 dpi (Fig. S1B) and influenced CD8<sup>+</sup> T cells (Fig. 1A-C).  
199 Anti-CD20 injection resulted in a significantly reduced CD8<sup>+</sup> T cell frequency and number at 20 dpi  
200 (Fig. 1A,  $\alpha$ CD20). As expected from the depletion of B cells, normal uninfected anti-CD20-treated  
201 mice had a higher frequency of CD8<sup>+</sup> T cells compared to uninfected isotype-treated control mice  
202 (Fig. 1A, day 0). The frequency and number of splenic Tskb20-specific CD8<sup>+</sup> T cells (parasite  
203 specific CD8<sup>+</sup>T cells) detected in infected control mice were similar to those of infected anti-CD20-  
204 treated mice until 14 dpi (Fig. 1B). After that, the percentage dropped dramatically in anti-CD20-  
205 treated mice, which presented a significantly lower frequency and number of *T. cruzi*-specific CD8<sup>+</sup>  
206 T cells at 20 dpi, remaining low up to 35 dpi (the last day of our analysis) (Fig. 1B). The frequency  
207 and number of Tskb20-specific CD8<sup>+</sup> T cells was also reduced in liver, a *T. cruzi* infection target  
208 organ, of infected anti-CD20-treated mice at 20 dpi (Fig. 1C). In concordance with the low number  
209 of total and parasite-specific CD8<sup>+</sup> T cells, anti-CD20-treated mice infected with *T. cruzi* had a  
210 higher parasite load than controls, as evidenced by the *T. cruzi* DNA fold increase in the liver, spleen  
211 and heart at 20 dpi (Fig. 1D).

212

213 *Anti-CD20 treatment decreased the number of effector and memory CD8<sup>+</sup> T cells and compromised*  
214 *their survival and proliferation*

215 An assessment of CD8<sup>+</sup> T cell subset distribution, based on CD62L versus CD44 expression, showed  
216 that the spleen of infected anti-CD20-treated mice at 20 dpi presented a higher percentage of naïve  
217 (CD62L<sup>hi</sup>CD44<sup>neg</sup>) and lower percentages of effector memory/effector (CD62L<sup>neg</sup>CD44<sup>hi</sup>) CD8<sup>+</sup> T  
218 cells in comparison to their counterparts from infected control mice (Fig. 2A). When the values were  
219 expressed in absolute numbers, we determined that anti-CD20-treated mice exhibited a significant  
220 reduction in all CD8<sup>+</sup> T cell subpopulations (Fig. 2A). The anti-CD20 injection decreased the  
221 frequency and number of splenic Tskb20/Kb<sup>+</sup> CD8<sup>+</sup> T cells with an effector phenotype but not the  
222 number of Tskb20/Kb<sup>+</sup> CD8<sup>+</sup> T cells with a naïve or central memory phenotype (Fig. 2B).

223 Considering that the general features of protective CD8<sup>+</sup> T cell responses against intracellular  
224 pathogens consist of the generation and expansion of short-lived highly functional effector

225 populations, we also evaluated the phenotype of CD8<sup>+</sup> T cells based on KLRG-1 and CD127  
226 expression (31). The frequency and number of total and parasite-specific CD8<sup>+</sup> T cells with a short-  
227 lived effector cell (SLEC) phenotype (CD44<sup>+</sup>KLRG1<sup>hi</sup>CD127<sup>lo</sup>) were significantly reduced in the  
228 group of anti-CD20-treated mice at 20 dpi (Fig. 2C-D). The frequencies of total (Fig. 2C) and  
229 Tskb20/Kb<sup>+</sup> (Fig. 2D) CD8<sup>+</sup> T cells with a memory precursor effector cell (MPEC) phenotype  
230 (CD44<sup>+</sup>KLRG1<sup>lo</sup>CD127<sup>hi</sup>) were similar in both experimental groups, but a strong reduction in the  
231 number of MPECs was observed in the infected anti-CD20-treated mice with respect to the infected  
232 control mice (Fig. 2C-D).

233 Splenic total and parasite-specific CD8<sup>+</sup> T cells from infected anti-CD20-treated mice had a  
234 significantly lower frequency of proliferating Ki-67<sup>+</sup> cells (Fig. 2E) and TMRE<sup>hi</sup> cells, which is  
235 compatible with cellular viability (Fig. 2F). These results indicate that anti-CD20 injection (B cell  
236 depletion) partially arrested CD8<sup>+</sup> T cell proliferation, leading to an early contraction of this  
237 protective response.

238

239 *Anti-CD20 treatment resulted in lower CD8<sup>+</sup> T cell functional activity*

240 In comparison to counterparts from infected control mice, splenic CD8<sup>+</sup> T cells from infected anti-  
241 CD20-treated mice had a reduced frequency of polyfunctional CD8<sup>+</sup> T cells (Fig. 3A), which are  
242 characterized by the simultaneous secretion of multiple cytokines and degranulation (see gating  
243 strategies in Fig. S2). Infected anti-CD20-injected mice exhibited a reduced frequency of IFN $\gamma$ <sup>+</sup>  
244 TNF<sup>+</sup> CD107a<sup>+</sup> (triple-positive), CD8<sup>+</sup> T cells and IFN $\gamma$ <sup>+</sup> TNF<sup>+</sup> or IFN $\gamma$ <sup>+</sup> CD107a<sup>+</sup> (double-positive)  
245 CD8<sup>+</sup> T cells after *in vitro* stimulation with PMA and ionomycin in comparison to infected control  
246 mice (Fig. 3A). Not only polyfunctional CD8<sup>+</sup> T cells were affected but the frequency of total IFN $\gamma$ -  
247 or TNF-producing CD8<sup>+</sup> T cells was also reduced in infected anti-CD20-treated mice (Fig. S3A, see  
248 polyclonal stimulation). In addition, splenocytes from infected anti-CD20-treated mice cultured with  
249 the parasite peptide Tskb20 had a reduced frequency of total IFN $\gamma$ <sup>+</sup>, TNF<sup>+</sup> and CD107a<sup>+</sup> and triple-  
250 and double-positive CD8<sup>+</sup> T cells when compared with splenocytes from controls (Fig. S3 A-B, see  
251 Ag-specific stimulation). As highlighted by the reduced MFI values in flow cytometry evaluation, we  
252 observed that Tskb20-specific CD8<sup>+</sup> T cells had lower IFN $\gamma$  expression, indicating less IFN $\gamma$   
253 production by parasite-specific CD8<sup>+</sup> T cells from infected anti-CD20-treated mice (Fig. S3C). In  
254 agreement with the reduction in the frequency of IFN $\gamma$ -producing CD8<sup>+</sup> T cells, total and parasite-  
255 specific CD8<sup>+</sup> T cells from infected anti-CD20-treated mice exhibited lower Tbet expression than  
256 CD8<sup>+</sup> T cells from control mice (Fig. 3B). Interestingly, CD8<sup>+</sup> T cells from infected anti-CD20-  
257 treated mice had similar levels of Tbet compared to CD8<sup>+</sup> T cells from uninfected mice (Fig. 3B, see  
258 histograms).

259 Next, we evaluated *in vivo* the cytotoxic capacity elicited in infected anti-CD20-treated mice in  
260 comparison to that in infected control and uninfected mice. For the evaluation, differentially stained  
261 antigen-parasite-loaded cells were transferred to the different groups of mice. Fig. 3C shows no  
262 specific lysis of PA8-loaded cells since this peptide is mainly present in other strains of the parasite,  
263 which are different from the strain used in this study (32). In addition, in infected anti-CD20-treated  
264 mice, the frequency of CFSE<sup>hi</sup> eFluor670<sup>neg</sup> Tskb20-pulsed cells and CFSE<sup>neg</sup> eFluor670<sup>+</sup> Tskb18-  
265 pulsed cells was higher than that in infected controls. The results indicate that infected anti-CD20-  
266 treated mice displayed a reduced capacity to specifically kill target cells pulsed with the parasite  
267 antigens Tskb20 and Tskb18.

268

#### 269 *Anti-CD20 treatment affected an established CD8<sup>+</sup> T cell response*

270 To analyze whether anti-CD20 injection affected an already established CD8<sup>+</sup> T cell response, *T.*  
271 *cruzi*-infected mice were injected with anti-CD20 mAb at 12 dpi when the parasite-specific CD8<sup>+</sup> T  
272 cell frequency had nearly peaked (see Fig. 1B). We determined that the injection of anti-CD20 at day  
273 12 dpi induced a reduction in the frequency and number of splenic parasite-specific CD8<sup>+</sup> T cells  
274 after 20 dpi, which was comparable with the effect of the treatment initiated before infection (Fig.  
275 4A). When compared to infected control mice, mice treated with anti-CD20 after 12 dpi exhibited a  
276 significantly reduced number of CD8<sup>+</sup> T cells with SLEC and MPEC phenotypes (Fig. 4B) and a  
277 diminished frequency of IFN $\gamma$ <sup>+</sup> CD8<sup>+</sup> T cells in splenocytes evaluated after polyclonal or antigen-  
278 specific stimulation (Fig. 4C). In line with the reduced frequency of IFN $\gamma$ <sup>+</sup>-producing cells, total and  
279 parasite-specific CD8<sup>+</sup> T cells from infected mice treated with anti-CD20 mAb at 12 dpi expressed  
280 lower levels of Tbet than CD8<sup>+</sup> T cells from infected control mice (Fig. 4D). In our experimental  
281 model, the results indicated that anti-CD20 injection did not affect the induction of the CD8<sup>+</sup> T cell  
282 response (see Fig. 1A) but probably affected their survival/maintenance.

283

#### 284 *B cells from T. cruzi-infected mice produce cytokines involved in CD8<sup>+</sup> T cell survival*

285 Cytokines contribute to the regulation of the contraction of the response, as well as the long-term  
286 maintenance of memory CD8<sup>+</sup> T cells (28, 33-35). Based on this and considering that anti-CD20  
287 injection depletes B cells from mice, we hypothesize that B cells could be the source of cytokines  
288 involved in the maintenance of the CD8<sup>+</sup> T cell response. By flow cytometry, we observed that *T.*  
289 *cruzi*-infected mice had IL-6 and IL-17A-producing B cells, and the numbers of these cells peak at  
290 15 dpi and remained high at 20-30 dpi (Fig. 5A). In comparison to lymphoid non-B cells, B cells

291 were the main source of IL-6 and IL-17A (Fig. 5A), while the main source of IL-10, IFN $\gamma$  and TNF  
292 within the lymphoid population were non-B cells (Fig. S4).

293 When mice were treated with anti-CD20 mAb prior to infection, a significant decrease in IL-6- and  
294 IL-17A-producing lymphoid cells was observed (Fig. 5B). Most of the cytokine-producing B cells  
295 were CD19<sup>low</sup>, which is compatible with the plasmablast phenotype (11). Interestingly, anti-CD20  
296 injection before the infection did not affect serum IL-6 concentration since IL-6 values were similar  
297 either at 15 and 20 dpi (Fig. 5C). The IL-17A concentration was undetectable in the sera from both  
298 groups of infected mice (data not shown).

299 Next, by immunofluorescence, we evaluated the spatial distribution of splenic B-, CD8<sup>+</sup> T- and IL-  
300 17A-producing cells. Fig. 5D shows B cell follicles (B220<sup>+</sup>) and CD3<sup>+</sup> T cells in uninfected and  
301 infected control mice. As expected, the extrafollicular plasmablasts (CD138<sup>+</sup>) were located in the T  
302 cell zone only in the spleen of infected control mice (23). Interestingly, IL-17A-producing  
303 plasmablasts and other IL-17A-producing cells were close to CD8<sup>+</sup> T cells (Fig. 5E), suggesting a  
304 potential interaction/cross talk between IL-17A-producing cells and CD8<sup>+</sup> T cells.

305 Interestingly we observed that anti-CD20 injection previous to infection did not affect neither the  
306 frequency and number of total CD4<sup>+</sup> T cells (Fig. S5A) nor Tbet expression in CD4<sup>+</sup> T cells (Fig.  
307 S5B). However, anti-CD20 treatment in infected mice also decreased the frequency and number of  
308 IL-17A<sup>+</sup>CD4<sup>+</sup>T cells (Fig. S5C)

309

310 *Recombinant IL-17A, but not IL-6, partially restored the number and function of CD8<sup>+</sup> T cells in*  
311 *infected anti-CD20-treated mice*

312 To evaluate the hypothesis that the absence/diminution of IL-17A could affect the maintenance of  
313 the CD8<sup>+</sup> T cell response in infected anti-CD20-treated mice, groups of these mice were injected with  
314 rIL-17A or PBS. Fig. 6 shows that injections of rIL-17A partially increased the frequency and  
315 number of total and Tskb20-specific CD8<sup>+</sup> T cells (Fig. 6A). In particular, the frequency and number  
316 of total and Tskb20-specific SLEC CD8<sup>+</sup> T cells, but not the frequency and number of the MPEC  
317 CD8<sup>+</sup> T cell population, were increased by rIL-17A supplementation (Fig. 6B).

318 In addition, rIL-17A partially increased the frequency and number of IFN $\gamma$ -producing CD8<sup>+</sup> T cells  
319 and restored the frequency of TNF-producing CD8<sup>+</sup> T cells (Fig. 7A). The increase in the frequency  
320 of IFN $\gamma$ -producing CD8<sup>+</sup> T cells in infected anti-CD20-treated mice injected with rIL-17A was  
321 accompanied by an increase in Tbet expression in total and Tskb20-specific CD8<sup>+</sup> T cells (Fig. 7B).



322 As expected, the increase in the number and functionality of CD8<sup>+</sup> T cells in infected anti-CD20-  
323 treated mice injected with rIL-17A was associated with a strong reduction in the parasite load in the  
324 liver, spleen and heart (Fig. 7C).  
325 Recombinant IL-6 injection in infected anti-CD20 treated mice did not increase the frequency and  
326 number of total and Tskb20-specific CD8<sup>+</sup> T cells (Fig. 8A) and did not modify the frequency and  
327 number of SLECs and MPECs CD8<sup>+</sup> T cell subsets (Fig. 8B). In addition, IL-6 injection to infected  
328 anti-CD20 treated mice was not able to modify total and Tskb20-specific INF $\gamma$ -producing CD8<sup>+</sup> T  
329 cells (Fig. 8C), nor Tbet expression in CD8<sup>+</sup> T cells (Fig. 8D).



## 330 **Discussion**

331 An understanding of the effects of anti-CD20 treatment, which leads to the elimination of B cells, on  
332 other cell types allows the identification of different side effects of this therapy and highlights the  
333 Ab-independent functions of B cells. In this study, we show that anti-CD20 injection altered  
334 antiparasitic CD8<sup>+</sup> T cell immunity when administered prior to the infection or after when the  
335 specific CD8<sup>+</sup> T cell response was already established. In our work, we determined that the CD8<sup>+</sup> T  
336 cell decrease in infected anti-CD20-treated mice affected both effector and memory cell numbers.  
337 Our kinetics studies indicated that treatment with anti-CD20 prior to infection did not affect the  
338 induction phase of the CD8<sup>+</sup> T cell response, indicating that B cells are not involved in the initial  
339 events that drive CD8<sup>+</sup> T cell immunity during *T. cruzi* infection. Similar results were reported for  
340 *Listeria monocytogenes* infection (15), in which B cells did not play any role in the initial activation  
341 or microorganism-driven expansion of CD8<sup>+</sup> T cells. Instead, we determined that, similar to the *L.*  
342 *monocytogenes* infection model, depletion of B cells by anti-CD20 injection significantly accelerated  
343 the contraction phase of the CD8<sup>+</sup> T cell response in *T. cruzi*-infected mice. Given the lower  
344 frequency of viable (TMRE<sup>hi</sup>) and proliferating CD8<sup>+</sup> T cells determined in infected anti-CD20-  
345 treated mice, it is likely that a reduced expansion rate could be responsible for the early contraction  
346 of the CD8<sup>+</sup> T cell response. In a similar way, a significant, long-lasting and reversible depletion  
347 effect on CD8<sup>+</sup> T cell counts was reported in patients with rheumatoid arthritis after 12 and 24 weeks  
348 of treatment with rituximab (36).

349 It has been reported that B cells can tolerize CD8<sup>+</sup> T cells (37), but we found that during *T. cruzi*  
350 infection, CD8<sup>+</sup> T cells became less functional in the absence of B cells. Anti-CD20 treatment  
351 reduced the functionality of CD8<sup>+</sup> T cells, as evidenced by a strong reduction in the frequency of  
352 cytokine-producing (IFN $\gamma$  or TNF) and polyfunctional (cytokine-producing and degranulating) CD8<sup>+</sup>  
353 T cells. *T. cruzi* peptide-pulsed cell transfer demonstrated that infected anti-CD20-treated mice had a  
354 significantly reduced capability to lyse not only Tskb20-loaded target cells but also Tskb18-loaded  
355 cells *in vivo*, suggesting that this treatment affected not only the immunodominant CD8<sup>+</sup> T cell  
356 response but also other *T. cruzi*-specific CD8<sup>+</sup> T cell responses. Administration of the anti-CD20  
357 treatment before or after infection led to an early contraction of the CD8<sup>+</sup> T cell response, suggesting  
358 that B cells, either directly or indirectly, participate in the maintenance of CD8<sup>+</sup> T cells.

359 Defective CD8<sup>+</sup> T cell functional activity has been associated with increased pathogen load during  
360 chronic infections (38). The role of polyfunctional CD8<sup>+</sup> T cells in the control of intracellular  
361 microorganisms was highlighted in patients infected with HIV, in which the frequency and  
362 proportion of the HIV-specific T cell response with the highest functionality inversely correlated

363 with the viral load in progressors (39). Accordingly, the deficient polyfunctionality of CD8<sup>+</sup> T cells  
364 from infected anti-CD20-treated mice was associated with a higher parasite load at 20 dpi. Notably,  
365 it has been reported that patients treated with anti-CD20 can develop different viral infections, which  
366 are the most common non-hematological adverse effects of this therapy. Viral infections in patients  
367 receiving anti-CD20 include severe respiratory tract infections, hepatitis B virus reactivation and  
368 varicella-zoster virus infection (40-42). Based on our results, we hypothesize that treatment of  
369 patients with anti-CD20 not only affects Ab-secreting cells, which can neutralize viruses, but could  
370 also affect the development or establishment of CD8<sup>+</sup> T cell responses, which are necessary for the  
371 control of intracellular infections. Additionally, we also observed that anti-CD20 did not modify  
372 CD4<sup>+</sup> T cell frequency and number but significantly affected IL-17 producing CD4<sup>+</sup> T cells. The  
373 results indicate that B cell depletion, directly or indirectly through the reduction of IL-17 producing  
374 cells reduce CD8<sup>+</sup> T cell immunity. Indeed, we observed that rIL-17 was able to partially reverse  
375 deficient CD8<sup>+</sup> T cell response.

376 In *T. cruzi* infection, two cytokines, IL-6 and IL-17A, have been reported to be involved in the  
377 improvement and maintenance of the CD8<sup>+</sup> T cell response (28, 33). IL-6 improves the cytotoxic  
378 CD8<sup>+</sup> T cell dysfunction triggered by nitric oxide in patients with Chagas Disease (33); additionally,  
379 we recently demonstrated that IL-17RA and IL-17A are critical factors for sustaining CD8<sup>+</sup> T cell  
380 immunity to *T. cruzi* (28). A possible role of IL-6 in the maintenance of the CD8<sup>+</sup> T cell response in  
381 our experimental model was ruled out by the fact that anti-CD20 treatment did not modify the  
382 concentration of serum IL-6 in infected mice and that rIL-6 injection did not improve or revert the  
383 deficient CD8<sup>+</sup> T cell response. In contrast, we observed that rIL-17A was able to reverse the  
384 quantitative and functional reduction in CD8<sup>+</sup> T immunity observed in *T. cruzi*-infected anti-CD20-  
385 treated mice. The results reported here reinforce the recent data obtained in our lab about the IL-  
386 17A/IL-17RA pathway-mediated roles of CD8<sup>+</sup> T cells (28) and position IL-17A as a key cytokine  
387 in the maintenance of the cytotoxic T cell response. Our results are also supported by the findings  
388 reported by Acharya et al (43), which showed that IL-17A directly potentiates CD8<sup>+</sup> T cell  
389 cytotoxicity against West Nile Virus infection.

390 In line with our findings, it was reported that  $\mu$ MT mice infected with *T. cruzi* Tulahuén strain  
391 exhibited a marked reduction in the CD8<sup>+</sup> T-cell subpopulation (44). Also, Sullivan and colleagues  
392 (45) observed that mice deficient in B cells that are infected with *T. cruzi* had a defective CD8<sup>+</sup> T  
393 cell response. They postulated that specific antibodies are capable of restoring the deficient CD8<sup>+</sup> T  
394 cell response, as the passive transfer of serum from infected but not normal mice reversed the  
395 magnitude and functionality as well as the exhausted phenotype observed in CD8<sup>+</sup> T cells (45).  
396 Considering that the transfer of purified antibodies was not performed in that study, it is possible that

397 the observed effect may be associated with the presence of IL-17A in addition to the specific  
398 antibodies.

399 High microorganism load, together with persistent antigenic stimulation, are considered the most  
400 important factors influencing CD8<sup>+</sup> T cell exhaustion and consequent loss of functionality. In *T.*  
401 *cruzi* infection, the relationship between parasite load and CD8<sup>+</sup> T cell dysfunction is controversial.  
402 We (28) and others (46) have reported that infection of C57BL/6 mice with increasing parasite loads  
403 does not result in reduced CD8<sup>+</sup> T cell cytotoxic effector function or the deletion of parasite-specific  
404 CD8<sup>+</sup> T cells. It is difficult to determine whether antigen persistence or parasite load contribute to the  
405 dysfunctional CD8<sup>+</sup> T cell response that we observed in infected anti-CD20-treated mice since rIL-  
406 17A injection substantially reduced the parasite load while simultaneously improve CD8<sup>+</sup> T cell  
407 response.

408 In this work, we have not established whether IL-17A acts, directly or indirectly, on CD8<sup>+</sup> T cells. In  
409 line with a direct effect, we reported that CD8<sup>+</sup> T cells with a memory phenotype express the highest  
410 levels of the IL-17A receptor in comparison to naïve and effector CD8<sup>+</sup> T cells (28). However, in our  
411 experimental model, IL-17A injection increased the number of CD8<sup>+</sup> T cells with the SLEC but not  
412 with the MPEC phenotype. Since MPEC are not terminally differentiated cells, it is possible that IL-  
413 17A may favor MPEC survival and simultaneously promote MPEC differentiation into SLECs.  
414 Nevertheless, we cannot discount an indirect function of IL-17A since this cytokine has been  
415 reported to favor cytotoxic T cell responses against *L. monocytogenes* infection by enhancing  
416 dendritic cell cross presentation (47).

417 In conclusion, our work provides evidence that anti-CD20 treatment affects not only B cell numbers  
418 but also IL-17 producing cells and CD8<sup>+</sup> T cell responses. This knowledge may be relevant for the  
419 clinical management of patients with autoimmune diseases or lymphomas who are receiving anti-  
420 CD20 treatment. Furthermore, given that IL-17A was able to revert CD8<sup>+</sup> T cell dysfunction in  
421 treated hosts, targeting the IL-17R pathway can help to control not only viral infections but also fight  
422 against other microbes and eventually tumors.

423 **Acknowledgments**

424

425 This work was supported by grants from the Agencia Nacional de Promoción Científica y Técnica  
426 (Foncyt, PICT 2011-2647 and PICT 2015-0645), Consejo Nacional de Investigaciones Científicas y  
427 Técnicas, CONICET, (PIP 112-20110100378), the Secretaría de Ciencia y Técnica-Universidad  
428 Nacional de Córdoba and the National Institute of Allergy And Infectious Diseases of the National  
429 Institutes of Health under Award Numbers R01AI116432 and R01AI110340.

430 The funders had no role in study design, data collection and interpretation, or the decision to submit  
431 the work for publication

432 The authors would like to thank M.P. Abadie, M.P. Crespo, V. Blanco, F. Navarro, D. Lutti, A.  
433 Romero, L. Gatica, G. Furlán, C. Sampredo and C.R. Mas for their excellent technical assistance.

434 C.L.M., E.V.A.R. and A.G. are researchers from CONICET. F.F.V., C.G.B., C.L.A.F., J.T.B., L.A.,  
435 Y.G. and M.G.S. thanks CONICET for the fellowship awarded.

436 We also acknowledge Genentech (S. San Francisco, CA) for provision of the anti-mouse-CD20 mAb  
437 and the NIH Tetramer Core Facility for provision of the APC-labeled Tskb20/Kb tetramer.

438

439 **Author contributions**

440

441 Conceptualization: F.F.V. and A.G.; Methodology: F.F.V. and A.G.; Formal Analysis: F.F.V. and  
442 C.G.B.; Investigation: F.F.V., C.G.B., C.L.A.F., J.T.B., L.A. Y.G. and M.G.S; Resources: A.G.;  
443 Writing – Original Draft: F.F.V. and A.G.; Writing – Review & Editing: C.L.M. and E.V.A.R.;  
444 Visualization: F.F.V.; Supervision: A.G.; E.V.A.R. and C.L.M.; Project Administration: A.G.;  
445 Funding Acquisition: A.G.; E.V.A.R. and C.L.M.

446

447 **Conflicts of interest**

448 The authors declare no competing interests.

## 449 References

- 450 1. Coiffier B, Thieblemont C, Van Den Neste E, Lepeu G, Plantier I, Castaigne S, Lefort S,  
451 Marit G, Macro M, Sebban C, Belhadj K, Bordessoule D, Ferme C, Tilly H. 2010. Long-term  
452 outcome of patients in the LNH-98.5 trial, the first randomized study comparing rituximab-  
453 CHOP to standard CHOP chemotherapy in DLBCL patients: a study by the Groupe d'Etudes  
454 des Lymphomes de l'Adulte. *Blood* 116:2040-5.
- 455 2. Hallek M, Fischer K, Fingerle-Rowson G, Fink AM, Busch R, Mayer J, Hensel M, Hopfinger  
456 G, Hess G, von Grunhagen U, Bergmann M, Catalano J, Zinzani PL, Caligaris-Cappio F,  
457 Seymour JF, Berrebi A, Jager U, Cazin B, Trneny M, Westermann A, Wendtner CM,  
458 Eichhorst BF, Staib P, Buhler A, Winkler D, Zenz T, Bottcher S, Ritgen M, Mendila M,  
459 Kneba M, Dohner H, Stilgenbauer S, International Group of I, German Chronic Lymphocytic  
460 Leukaemia Study G. 2010. Addition of rituximab to fludarabine and cyclophosphamide in  
461 patients with chronic lymphocytic leukaemia: a randomised, open-label, phase 3 trial. *Lancet*  
462 376:1164-74.
- 463 3. Edwards JC, Szczepanski L, Szechinski J, Filipowicz-Sosnowska A, Emery P, Close DR,  
464 Stevens RM, Shaw T. 2004. Efficacy of B-cell-targeted therapy with rituximab in patients  
465 with rheumatoid arthritis. *N Engl J Med* 350:2572-81.
- 466 4. Kelly-Scumpia KM, Scumpia PO, Weinstein JS, Delano MJ, Cuenca AG, Nacionales DC,  
467 Wynn JL, Lee PY, Kumagai Y, Efron PA, Akira S, Wasserfall C, Atkinson MA, Moldawer  
468 LL. 2011. B cells enhance early innate immune responses during bacterial sepsis. *J Exp Med*  
469 208:1673-82.
- 470 5. Elsegeiny W, Eddens T, Chen K, Kolls JK. 2015. Anti-CD20 antibody therapy and  
471 susceptibility to *Pneumocystis pneumonia*. *Infect Immun* 83:2043-52.
- 472 6. Mizoguchi A, Mizoguchi E, Takedatsu H, Blumberg RS, Bhan AK. 2002. Chronic intestinal  
473 inflammatory condition generates IL-10-producing regulatory B cell subset characterized by  
474 CD1d upregulation. *Immunity* 16:219-30.
- 475 7. Fillatreau S, Sweenie CH, McGeachy MJ, Gray D, Anderton SM. 2002. B cells regulate  
476 autoimmunity by provision of IL-10. *Nat Immunol* 3:944-50.
- 477 8. Mauri C, Gray D, Mushtaq N, Londei M. 2003. Prevention of arthritis by interleukin 10-  
478 producing B cells. *J Exp Med* 197:489-501.
- 479 9. Neves P, Lampropoulou V, Calderon-Gomez E, Roch T, Stervbo U, Shen P, Kuhl AA,  
480 Loddenkemper C, Haury M, Nedospasov SA, Kaufmann SH, Steinhoff U, Calado DP,  
481 Fillatreau S. 2010. Signaling via the MyD88 adaptor protein in B cells suppresses protective  
482 immunity during *Salmonella typhimurium* infection. *Immunity* 33:777-90.
- 483 10. Shen P, Roch T, Lampropoulou V, O'Connor RA, Stervbo U, Hilgenberg E, Ries S, Dang  
484 VD, Jaimes Y, Daridon C, Li R, Jouneau L, Boudinot P, Wilantri S, Sakwa I, Miyazaki Y,  
485 Leech MD, McPherson RC, Wirtz S, Neurath M, Hoehlig K, Meinel E, Grutzkau A, Grun JR,  
486 Horn K, Kuhl AA, Dorner T, Bar-Or A, Kaufmann SHE, Anderton SM, Fillatreau S. 2014.  
487 IL-35-producing B cells are critical regulators of immunity during autoimmune and  
488 infectious diseases. *Nature* 507:366-370.
- 489 11. Bermejo DA, Jackson SW, Gorosito-Serran M, Acosta-Rodriguez EV, Amezcua-Vesely MC,  
490 Sather BD, Singh AK, Khim S, Mucci J, Liggitt D, Campetella O, Oukka M, Gruppi A,  
491 Rawlings DJ. 2013. *Trypanosoma cruzi* trans-sialidase initiates a program independent of the  
492 transcription factors ROR $\gamma$  and Ahr that leads to IL-17 production by activated B cells.  
493 *Nat Immunol* 14:514-22.
- 494 12. Bjarnadottir K, Benkhoucha M, Merkler D, Weber MS, Payne NL, Bernard CC, Molnarfi N,  
495 Lalive PH. 2016. B cell-derived transforming growth factor-beta1 expression limits the  
496 induction phase of autoimmune neuroinflammation. *Sci Rep* 6:34594.

- 497 13. Vazquez MI, Catalan-Dibene J, Zlotnik A. 2015. B cells responses and cytokine production  
498 are regulated by their immune microenvironment. *Cytokine* 74:318-26.
- 499 14. Guo L, Kapur R, Aslam R, Speck ER, Zufferey A, Zhao Y, Kim M, Lazarus AH, Ni H,  
500 Semple JW. 2016. CD20+ B-cell depletion therapy suppresses murine CD8+ T-cell-mediated  
501 immune thrombocytopenia. *Blood* 127:735-8.
- 502 15. Shen H, Whitmire JK, Fan X, Shedlock DJ, Kaech SM, Ahmed R. 2003. A specific role for B  
503 cells in the generation of CD8 T cell memory by recombinant *Listeria monocytogenes*. *J*  
504 *Immunol* 170:1443-51.
- 505 16. Lykken JM, DiLillo DJ, Weimer ET, Roser-Page S, Heise MT, Grayson JM, Weitzmann  
506 MN, Tedder TF. 2014. Acute and chronic B cell depletion disrupts CD4+ and CD8+ T cell  
507 homeostasis and expansion during acute viral infection in mice. *J Immunol* 193:746-56.
- 508 17. Asano MS, Ahmed R. 1996. CD8 T cell memory in B cell-deficient mice. *J Exp Med*  
509 183:2165-74.
- 510 18. DiLillo DJ, Yanaba K, Tedder TF. 2010. B cells are required for optimal CD4+ and CD8+ T  
511 cell tumor immunity: therapeutic B cell depletion enhances B16 melanoma growth in mice. *J*  
512 *Immunol* 184:4006-16.
- 513 19. Tarleton RL. 2007. Immune system recognition of *Trypanosoma cruzi*. *Curr Opin Immunol*  
514 19:430-4.
- 515 20. Fernandes MC, Andrews NW. 2012. Host cell invasion by *Trypanosoma cruzi*: a unique  
516 strategy that promotes persistence. *FEMS Microbiol Rev* 36:734-47.
- 517 21. Jordan KA, Hunter CA. 2010. Regulation of CD8+ T cell responses to infection with  
518 parasitic protozoa. *Exp Parasitol* 126:318-25.
- 519 22. Padilla AM, Simpson LJ, Tarleton RL. 2009. Insufficient TLR activation contributes to the  
520 slow development of CD8+ T cell responses in *Trypanosoma cruzi* infection. *J Immunol*  
521 183:1245-52.
- 522 23. Bermejo DA, Amezcua Vesely MC, Khan M, Acosta Rodriguez EV, Montes CL, Merino  
523 MC, Toellner KM, Mohr E, Taylor D, Cunningham AF, Gruppi A. 2011. *Trypanosoma cruzi*  
524 infection induces a massive extrafollicular and follicular splenic B-cell response which is a  
525 high source of non-parasite-specific antibodies. *Immunology* 132:123-33.
- 526 24. Gorosito Serran M, Tosello Boari J, Fiocca Vernengo F, Beccaria CG, Ramello MC, Bermejo  
527 DA, Cook AG, Vinuesa CG, Montes CL, Acosta Rodriguez EV, Gruppi A. 2017.  
528 Unconventional Pro-inflammatory CD4(+) T Cell Response in B Cell-Deficient Mice  
529 Infected with *Trypanosoma cruzi*. *Front Immunol* 8:1548.
- 530 25. Tosello Boari J, Amezcua Vesely MC, Bermejo DA, Ramello MC, Montes CL, Cejas H,  
531 Gruppi A, Acosta Rodriguez EV. 2012. IL-17RA signaling reduces inflammation and  
532 mortality during *Trypanosoma cruzi* infection by recruiting suppressive IL-10-producing  
533 neutrophils. *PLoS Pathog* 8:e1002658.
- 534 26. Martin DL, Weatherly DB, Laucella SA, Cabinian MA, Crim MT, Sullivan S, Heiges M,  
535 Craven SH, Rosenberg CS, Collins MH, Sette A, Postan M, Tarleton RL. 2006. CD8+ T-Cell  
536 responses to *Trypanosoma cruzi* are highly focused on strain-variant trans-sialidase epitopes.  
537 *PLoS Pathog* 2:e77.
- 538 27. Amezcua Vesely MC, Schwartz M, Bermejo DA, Montes CL, Cautivo KM, Kalergis AM,  
539 Rawlings DJ, Acosta-Rodriguez EV, Gruppi A. 2012. FcγRIIIb and BAFF differentially  
540 regulate peritoneal B1 cell survival. *J Immunol* 188:4792-800.
- 541 28. Tosello Boari J, Araujo Furlan CL, Fiocca Vernengo F, Rodriguez C, Ramello MC, Amezcua  
542 Vesely MC, Gorosito Serran M, Nunez NG, Richer W, Piaggio E, Montes CL, Gruppi A,  
543 Acosta Rodriguez EV. 2018. IL-17RA-Signaling Modulates CD8+ T Cell Survival and  
544 Exhaustion During *Trypanosoma cruzi* Infection. *Front Immunol* 9:2347.
- 545 29. Quinton LJ, Blahna MT, Jones MR, Allen E, Ferrari JD, Hilliard KL, Zhang X, Sabharwal V,  
546 Algul H, Akira S, Schmid RM, Pelton SI, Spira A, Mizgerd JP. 2012. Hepatocyte-specific



- 547 mutation of both NF-kappaB RelA and STAT3 abrogates the acute phase response in mice. *J*  
548 *Clin Invest* 122:1758-63.
- 549 30. Yang XO, Chang SH, Park H, Nurieva R, Shah B, Acero L, Wang YH, Schluns KS,  
550 Broaddus RR, Zhu Z, Dong C. 2008. Regulation of inflammatory responses by IL-17F. *J Exp*  
551 *Med* 205:1063-75.
- 552 31. Joshi NS, Cui W, Chandele A, Lee HK, Urso DR, Hagman J, Gapin L, Kaech SM. 2007.  
553 Inflammation directs memory precursor and short-lived effector CD8(+) T cell fates via the  
554 graded expression of T-bet transcription factor. *Immunity* 27:281-95.
- 555 32. Low HP, Santos MA, Wizel B, Tarleton RL. 1998. Amastigote surface proteins of  
556 *Trypanosoma cruzi* are targets for CD8+ CTL. *J Immunol* 160:1817-23.
- 557 33. Sanmarco LM, Visconti LM, Eberhardt N, Ramello MC, Ponce NE, Spitale NB, Vozza ML,  
558 Bernardi GA, Gea S, Minguez AR, Aoki MP. 2016. IL-6 Improves the Nitric Oxide-Induced  
559 Cytotoxic CD8+ T Cell Dysfunction in Human Chagas Disease. *Front Immunol* 7:626.
- 560 34. Badovinac VP, Porter BB, Harty JT. 2004. CD8+ T cell contraction is controlled by early  
561 inflammation. *Nat Immunol* 5:809-17.
- 562 35. Cousens LP, Peterson R, Hsu S, Dorner A, Altman JD, Ahmed R, Biron CA. 1999. Two  
563 roads diverged: interferon alpha/beta- and interleukin 12-mediated pathways in promoting T  
564 cell interferon gamma responses during viral infection. *J Exp Med* 189:1315-28.
- 565 36. Melet J, Mulleman D, Goupille P, Ribourtout B, Watier H, Thibault G. 2013. Rituximab-  
566 induced T cell depletion in patients with rheumatoid arthritis: association with clinical  
567 response. *Arthritis Rheum* 65:2783-90.
- 568 37. Bennett SR, Carbone FR, Toy T, Miller JF, Heath WR. 1998. B cells directly tolerize CD8(+)  
569 T cells. *J Exp Med* 188:1977-83.
- 570 38. Mueller SN, Ahmed R. 2009. High antigen levels are the cause of T cell exhaustion during  
571 chronic viral infection. *Proc Natl Acad Sci U S A* 106:8623-8.
- 572 39. Betts MR, Nason MC, West SM, De Rosa SC, Migueles SA, Abraham J, Lederman MM,  
573 Benito JM, Goepfert PA, Connors M, Roederer M, Koup RA. 2006. HIV nonprogressors  
574 preferentially maintain highly functional HIV-specific CD8+ T cells. *Blood* 107:4781-9.
- 575 40. Aksoy S, Harputluoglu H, Kilickap S, Dede DS, Dizdar O, Altundag K, Barista I. 2007.  
576 Rituximab-related viral infections in lymphoma patients. *Leuk Lymphoma* 48:1307-12.
- 577 41. Cohen SB, Emery P, Greenwald MW, Dougados M, Furie RA, Genovese MC, Keystone EC,  
578 Loveless JE, Burmester GR, Cravets MW, Hesse EW, Shaw T, Totoritis MC, Group RT.  
579 2006. Rituximab for rheumatoid arthritis refractory to anti-tumor necrosis factor therapy:  
580 Results of a multicenter, randomized, double-blind, placebo-controlled, phase III trial  
581 evaluating primary efficacy and safety at twenty-four weeks. *Arthritis Rheum* 54:2793-806.
- 582 42. Hua Q, Zhu Y, Liu H. 2015. Severe and fatal adverse events risk associated with rituximab  
583 addition to B-cell non-Hodgkin's lymphoma (B-NHL) chemotherapy: a meta-analysis. *J*  
584 *Chemother* 27:365-70.
- 585 43. Acharya D, Wang P, Paul AM, Dai J, Gate D, Lowery JE, Stokic DS, Leis AA, Flavell RA,  
586 Town T, Fikrig E, Bai F. 2017. Interleukin-17A Promotes CD8+ T Cell Cytotoxicity To  
587 Facilitate West Nile Virus Clearance. *J Virol* 91.
- 588 44. Cardillo F, Postol E, Nihei J, Aroeira LS, Nomizo A, Mengel J. 2007. B cells modulate T  
589 cells so as to favour T helper type 1 and CD8+ T-cell responses in the acute phase of  
590 *Trypanosoma cruzi* infection. *Immunology* 122:584-95.
- 591 45. Sullivan NL, Eickhoff CS, Sagartz J, Hoft DF. 2015. Deficiency of antigen-specific B cells  
592 results in decreased *Trypanosoma cruzi* systemic but not mucosal immunity due to CD8 T  
593 cell exhaustion. *J Immunol* 194:1806-18.
- 594 46. Tzelepis F, Persechini PM, Rodrigues MM. 2007. Modulation of CD4(+) T cell-dependent  
595 specific cytotoxic CD8(+) T cells differentiation and proliferation by the timing of increase in  
596 the pathogen load. *PLoS One* 2:e393.

- 597 47. Xu S, Han Y, Xu X, Bao Y, Zhang M, Cao X. 2010. IL-17A-producing gammadeltaT cells  
598 promote CTL responses against *Listeria monocytogenes* infection by enhancing dendritic cell  
599 cross-presentation. *J Immunol* 185:5879-87.  
600  
601



602 **Legends for Figures**

603

604 **FIGURE 1. Anti-CD20 treatment reduced CD8<sup>+</sup> T cells and increased tissue parasitism.**

605 Mice injected with isotype control (control; in white circles) or anti-CD20 ( $\alpha$ CD20; in black circles)  
606 mAb were infected with 5000 trypomastigotes of *T. cruzi* Tulahuén strain. Representative dot plot  
607 and statistical analysis of the mean  $\pm$  SD of the percentage and number of: (A) CD8<sup>+</sup>CD3<sup>+</sup> T cells  
608 and (B) Tskb20/Kb<sup>+</sup>CD8<sup>+</sup> T cells, within the lymphocyte gate, in the spleen from uninfected (day 0)  
609 or infected mice at different dpi. (C) Representative plots and statistical analysis of the mean  $\pm$  SD of  
610 the percentage and number of Tskb20/Kb<sup>+</sup>CD8<sup>+</sup> T cells in liver at 20 dpi in control (white bars) or  
611 anti-CD20 treated mice (black bars). Numbers within the plots indicate the frequency of cells in each  
612 region. N=4-5 mice per group. (D) Relative amount of *T. cruzi* satellite DNA in liver, spleen and  
613 heart from infected control and anti-CD20-treated mice determined at 20 dpi. Murine GAPDH was  
614 used for normalization. Data are presented as mean  $\pm$  SD, N=4 mice per group. P values calculated  
615 with two tailed T test. Data are representative of four (A-C), and two (D) independent experiments.  
616

617 **FIGURE 2. Anti-CD20 treatment decreased effector and memory CD8<sup>+</sup> T cell number and  
618 compromised their survival and proliferation.**

619 Mice injected with isotype control (control; in white bars) or anti-CD20 ( $\alpha$ CD20; in black bars) mAb  
620 were infected with 5000 trypomastigotes of *T. cruzi* Tulahuén strain. Splenic cells were obtained at  
621 20 dpi and analyzed by flow cytometry. (A) Representative plots of CD62L vs CD44 expression on  
622 CD8<sup>+</sup> T cells. Statistical analysis of the frequency and number of naïve (CD62L<sup>hi</sup>CD44<sup>lo</sup>), effector  
623 memory/effector (CD62L<sup>lo</sup>CD44<sup>hi</sup>) and central memory (CD62L<sup>hi</sup>CD44<sup>hi</sup>) cells of: (A) total CD8<sup>+</sup>  
624 and (B) Tskb20/Kb<sup>+</sup>CD8<sup>+</sup> T cells. (C) Representative plots of KLRG-1 vs CD127 expression on  
625 CD44<sup>+</sup>CD8<sup>+</sup> T cells. Statistical analysis of the frequency and number of short-lived effector cells  
626 (SLEC: KLRG<sup>hi</sup>CD127<sup>lo</sup>) and memory precursor effector cells (MPEC: KLRG<sup>lo</sup>CD127<sup>hi</sup>) of (C)  
627 total CD44<sup>+</sup>CD8<sup>+</sup> and (D) CD44<sup>+</sup>Tskb20/Kb<sup>+</sup> CD8<sup>+</sup> T cells. (E) Plots and bar graphs representing the  
628 frequency of Ki67<sup>+</sup> cells on gated CD8<sup>+</sup> or Tskb20/Kb<sup>+</sup>CD8<sup>+</sup> T cells. (F) Plots and bar graphs  
629 representing the frequency of viable non-apoptotic TMRE<sup>hi</sup> cells on gated CD8<sup>+</sup> or Tskb20/Kb<sup>+</sup>CD8<sup>+</sup>  
630 T cells. Numbers within the plots indicate the frequency of cells in each region. Bar graphs represent  
631 data as mean  $\pm$  SD, N=4-5 mice. All P values calculated with two-tailed T test. Data are  
632 representative of three (A-D) and two (E-F) independent experiments.  
633

634 **FIGURE 3: Anti-CD20 treatment resulted in a lower CD8<sup>+</sup> T cell functional activity**

635 Mice injected with isotype control (control) or anti-CD20 ( $\alpha$ CD20) mAb were infected with 5000  
636 trypomastigotes of *T. cruzi* Tulahuén strain. Uninfected mice were processed in parallel. Splenic  
637 cells were obtained at 20 dpi and analyzed by flow cytometry. (A) Chart pie with the frequency  $\pm$  SD  
638 of polyfunctional CD8<sup>+</sup> T cells upon PMA+Ionomycin stimulation. References of the different  
639 populations (IFN $\gamma$ <sup>+</sup>TNF<sup>+</sup>CD107a<sup>+</sup>, triple positive; IFN $\gamma$ <sup>+</sup>TNF<sup>+</sup> or IFN $\gamma$ <sup>+</sup>CD107a<sup>+</sup>, double positive;  
640 IFN $\gamma$ <sup>+</sup> single positive CD8<sup>+</sup> T cells) are indicated in the table at the right. (B) Representative  
641 histograms and statistical analysis of Tbet expression in total and Tskb20/Kb<sup>+</sup>CD8<sup>+</sup> T cells from  
642 infected control (empty solid line) or anti-CD20-treated (empty dashed line) mice or uninfected mice  
643 (gray fill solid line). (C) Representative dot plots of the frequency of transferred antigen-pulsed and  
644 unpulsed cells in the spleen of uninfected and infected control or anti-CD20-treated mice at 20 dpi  
645 (left panel), and statistical analysis of percentage of specific lysis (right panel) in infected control  
646 (white bars) or anti-CD20-treated (black bars) mice. N= 5-6 (A-B) and 4-5 (C) mice per group. P  
647 values calculated with two tailed T test. Data are representative of three (A-B) and two (C)  
648 independent experiments.  
649

650

651 **FIGURE 4. *T. cruzi* infected mice treated with anti-CD20 mAb at 12 dpi also had a reduced**  
652 **CD8<sup>+</sup> T cell response.**

653 Mice infected with 5000 trypomastigotes of *T. cruzi* Tulahuén strain were injected with isotype  
654 control (control; white bars) or anti-CD20 mAb at 12 dpi (12dpi  $\alpha$ CD20; gray bars). Mice injected  
655 with anti-CD20 mAb 8 days before the infection with 5000 trypomastigotes of *T. cruzi* Tulahuén  
656 strain were processed in parallel ( $\alpha$ CD20; black bars). The spleens of the different groups of mice  
657 were obtained at 20 dpi. (A) Representative dot plot showing the percentage of Tskb20/Kb<sup>+</sup>CD8<sup>+</sup> T  
658 cells, within the lymphocyte gate; and statistical analysis of the mean  $\pm$  SD of the percentages and  
659 number of indicated cells. (B) Statistical analysis of the number of SLECs and MPECs in total CD8<sup>+</sup>  
660 and Tskb20/Kb<sup>+</sup>CD8<sup>+</sup> T cells. (C) Statistical analysis of total IFN $\gamma$ <sup>+</sup>CD8<sup>+</sup> T cell frequency of splenic  
661 cells stimulated with PMA+Ionomycin (Polyclonal stimulation) or with Tskb20 (Ag-specific  
662 stimulation) after 5h of culture. (D) Statistical analysis of Tbet expression on total and  
663 TSKB20/Kb<sup>+</sup>CD8<sup>+</sup> T cells. N= 5-6 (A) and 4-5 (B-D) mice per group. P values were calculated with  
664 one-way ANOVA followed by Bonferroni's posttest. Data are representative of three (A) and two  
665 (B-D) independent experiments.

666

667 **FIGURE 5. Splenic B cells from *T. cruzi* infected mice were the main IL-6 and IL-17A-**  
668 **producing lymphoid cells**

669 (A) C57BL/6 mice were infected with 5000 trypomastigotes of *T. cruzi* Tulahuén strain and analyzed  
670 at different dpi. Zero dpi indicates uninfected mice. Statistical analysis of the percentage of IL-6 or  
671 IL-17A-producing CD19<sup>+</sup> (B) or CD19<sup>neg</sup> (Non-B) cells within the lymphocyte gate, in the spleen  
672 from uninfected (0dpi) or infected mice at different dpi. (B) Representative plots and statistical  
673 analysis of IL-6 or IL-17A-producing lymphoid cells at 15 dpi, obtained from infected control (white  
674 bars) or anti-CD20-treated (black bars) mice. (C) Serum IL-6 concentration in infected control or  
675  $\alpha$ CD20-treated mice determined at 15 and 20 dpi. (D) Immunofluorescence of spleen sections from  
676 uninfected and *T. cruzi* infected mice obtained at 15 dpi, stained with anti-CD3 (green), anti-B220  
677 (red) and anti-CD138 (blue). (E) Immunofluorescence of spleen sections from *T. cruzi* infected mice  
678 obtained at 15 dpi, stained with anti-CD8 (green), anti-IL-17A (red) and anti-CD138 (blue). The  
679 image on the right represents the binary expression of the positive fluorescence observed in the  
680 image on the left. N= 4-5 (A-C) and 3-4 (D-E) mice per group. P values were calculated with two  
681 tailed T test. Data are representative of three (A-B) and two (C-E) independent experiments.

682

683 **FIGURE 6. IL-17A rescued the magnitude and effector phenotype of the CD8<sup>+</sup> T cell response**  
684 **observed in infected anti-CD20-treated mice**

685 Mice infected with 5000 trypomastigotes of *T. cruzi* Tulahuén strain were injected with isotype  
686 control (control; white bars) or anti-CD20 mAb 8 days before infection. Infected mice injected with  
687 anti-CD20 mAb were also injected with PBS ( $\alpha$ CD20, black bars) or rIL-17A ( $\alpha$ CD20 + rIL-17A,  
688 gray bars) at 12, 14, 16 and 18 dpi. The spleens of the different groups of mice were obtained at 20  
689 dpi. (A) Representative dot plot showing the percentage of total and TSKB20/Kb<sup>+</sup>CD8<sup>+</sup> T cells,  
690 gated on lymphoid cells; and statistical analysis of the mean  $\pm$  SD of the percentages and number of  
691 indicated cells. (B) Statistical analysis of the number of SLECs and MPECs in total and Tskb20/Kb<sup>+</sup>-  
692 specific CD8<sup>+</sup> T cells. N= 4-5 (A-B) mice per group. P values were calculated with one-way  
693 ANOVA followed by Bonferroni's posttest. Data are representative of three independent  
694 experiments.

695

696 **FIGURE 7. IL-17A increased the functionality of CD8<sup>+</sup> T cells and favored parasite control in**  
697 **infected anti-CD20-treated mice**

698 Mice infected with 5000 trypomastigotes of *T. cruzi* Tulahuén strain were injected with isotype  
699 control (control; white bars) or anti-CD20 mAb 8 days before infection. Infected mice injected with

700 anti-CD20 mAb were injected with PBS ( $\alpha$ CD20, black bars) or rIL-17A ( $\alpha$ CD20 + rIL-17A, gray  
701 bars) at 12, 14, 16 and 18 dpi. The spleens of the different groups of mice were obtained at 20 dpi.  
702 (A) Representative dot plot and statistical analysis of the percentage and number of IFN $\gamma$ <sup>+</sup> or the  
703 percentage TNF<sup>+</sup> cells, gated on CD8<sup>+</sup> T cells, obtained after polyclonal or Ag-specific stimulation.  
704 (B) Representative histograms and statistical analysis of Tbet expression in total and  
705 Tskb20/Kb<sup>+</sup>CD8<sup>+</sup> T cells from infected control (black solid line) or anti-CD20-treated mice injected  
706 with PBS (black dashed line) or with rIL-17A (gray solid line). (C) Relative amount of *T. cruzi*  
707 satellite DNA in liver, spleen and heart determined at 20 dpi. Murine GAPDH was used for  
708 normalization. N= 5-6 (A-B) and 3-4 (C) mice per group. P values were calculated with one-way  
709 ANOVA followed by Bonferroni's posttest. Data are representative of three (A-B) and two (C)  
710 independent experiments.

711

712 **FIGURE 8. IL-6 did not modify the magnitude and effector phenotype of the CD8<sup>+</sup> T cell**  
713 **response observed in infected anti-CD20-treated mice**

714 Mice infected with 5000 trypomastigotes of *T. cruzi* Tulahuén strain were injected with isotype  
715 control (control; white bars) or anti-CD20 mAb 8 days before infection. Infected mice injected with  
716 anti-CD20 mAb were also injected with PBS ( $\alpha$ CD20, black bars) or rIL-6 ( $\alpha$ CD20 + rIL-6, gray  
717 bars) at 12, 14, 16 and 18 dpi. The spleens of the different groups of mice were obtained at 20 dpi.  
718 (A) Representative dot plot showing the percentage of total and TSKB20/Kb<sup>+</sup>CD8<sup>+</sup> T cells, gated on  
719 lymphoid cells; and statistical analysis of the mean  $\pm$  SD of the percentages and number of indicated  
720 cells. (B) Statistical analysis of the number of SLECs and MPECs in total and Tskb20/Kb<sup>+</sup>-specific  
721 CD8<sup>+</sup> T cells. (C) Statistical analysis of total IFN $\gamma$ <sup>+</sup>CD8<sup>+</sup> T cell frequency of splenic cells stimulated  
722 with PMA+Ionomycin (Polyclonal stimulation) or with Tskb20 (Ag-specific stimulation) after 5h of  
723 culture. (D) Statistical analysis of Tbet expression on total and TSKB20/Kb<sup>+</sup>CD8<sup>+</sup> T cells. N= 4-6  
724 (A-D) mice per group. P values were calculated with one-way ANOVA followed by Bonferroni's  
725 posttest. Data are representative of two independent experiments.

## 726 **Legends for Supplemental Figures**

727

728 Fig. S1: *B cell depletion by anti-CD20 injection.* (A) C57BL/6 mice were injected with isotype  
729 control (control; in white bars) or anti-CD20 (in black bars) mAb, and B cell (CD19+B220+)  
730 frequency was determined in the spleen and blood at 8 days post-injection. (B-C) Mice injected with  
731 isotype control (control; in white circles) or anti-CD20 (in black circles) mAb were infected with  
732 5000 trypomastigotes of *T. cruzi* Tulahuén strain at 8 days post anti-CD20 injection. C57BL/6  
733 untreated uninfected mice were processed in parallel (in gray). (B) Number of B cells determined  
734 by flow cytometry. Statistical differences were evaluated between infected control and anti-CD20-  
735 treated mice at different dpi. (C) Immunofluorescence of spleen sections (7  $\mu$ m) from control and  
736 anti-CD20-treated mice at 14dpi, stained with PE-labeled anti-B220 (white). Magnification:  $\times$ 200.  
737 Right, statistical analysis of the percentage of area occupied by B220<sup>+</sup> cells (n=4 for infected control  
738 (white bar) or anti-CD20-treated (black bar) mice). P values calculated with two tailed T test. Data  
739 are representative of two independent experiments.

740

741 Fig. S2: *Flow cytometric gating strategy used to identify polyfunctional CD8<sup>+</sup> T cells.* Representative  
742 dot plots showing the frequency of IFN $\gamma$ <sup>+</sup>, CD107a<sup>+</sup> and TNF<sup>+</sup> (single positive) cells, gated on  
743 splenic CD8<sup>+</sup>T cells, from infected control or anti-CD20-treated mice incubated with Medium or  
744 with PMA+Ionomycin (Polyclonal stimulation) or Tskb20 (Ag-specific stimulation) after 5h of  
745 culture.

746

747 Fig. S3: *CD8<sup>+</sup> T cell functionality after polyclonal and parasite-specific stimulation.* (A) Statistical  
748 analysis of the frequency of total IFN $\gamma$ <sup>+</sup>, TNF<sup>+</sup> or CD107a<sup>+</sup> CD8<sup>+</sup> T cells in the spleen of infected  
749 control (white bars) or anti-CD20-treated (black bars) mice obtained at 20 dpi and stimulated with  
750 PMA+Ionomycin (Polyclonal stimulation) or with Tskb20 (Ag-specific stimulation) after 5h of  
751 culture. (B) Frequency of the polyfunctional CD8<sup>+</sup> T cells in the spleen of infected control (white  
752 bars) or anti-CD20-treated (black bars) mice after *in vitro* Tskb20 stimulation. Data are presented as  
753 mean of 5-6 mice per group  $\pm$  SD. P values calculated with two tailed T test. Data are representative  
754 of three independent experiments.

755

756 Fig. S4: *Th17 response in infected anti-CD20-treated mice.* (A) Statistical analysis of the frequency  
757 and number of CD4<sup>+</sup> T cells in the spleen of control (white bars) or anti-CD20-treated (black bars)  
758 mice analyzed after 20 dpi with *T. cruzi*. (B) Statistical analysis of Tbet expression in CD4<sup>+</sup> T cells in  
759 the spleen of control or anti-CD20-treated mice evaluated after 20 dpi with *T. cruzi*. (C)  
760 Representative plots and statistical analysis of the frequency and number of spleen Th17 cells  
761 determined at 15 dpi in control and anti-CD20-treated mice, after PMA+Ionomycin stimulation. Data  
762 are presented as mean of 5-6 mice per group  $\pm$  SD. P values calculated with two tailed T test. Data  
763 are representative of two independent experiments.

764

765 Fig. S5: *Source of IL-10, IFN $\gamma$  and TNF in lymphoid splenic cells from T. cruzi infected mice.*  
766 C57BL/6 mice were infected with 5000 trypomastigotes of *T. cruzi* Tulahuén strain and evaluated at  
767 different dpi. Zero dpi indicate uninfected mice. Statistical analysis of the percentage IL-10, IFN $\gamma$   
768 and TNF-producing CD19<sup>+</sup> (B) or CD19<sup>neg</sup> (Non-B) cells within lymphocyte gate, in the spleen from  
769 uninfected or infected mice at different dpi.



Figure 1

A

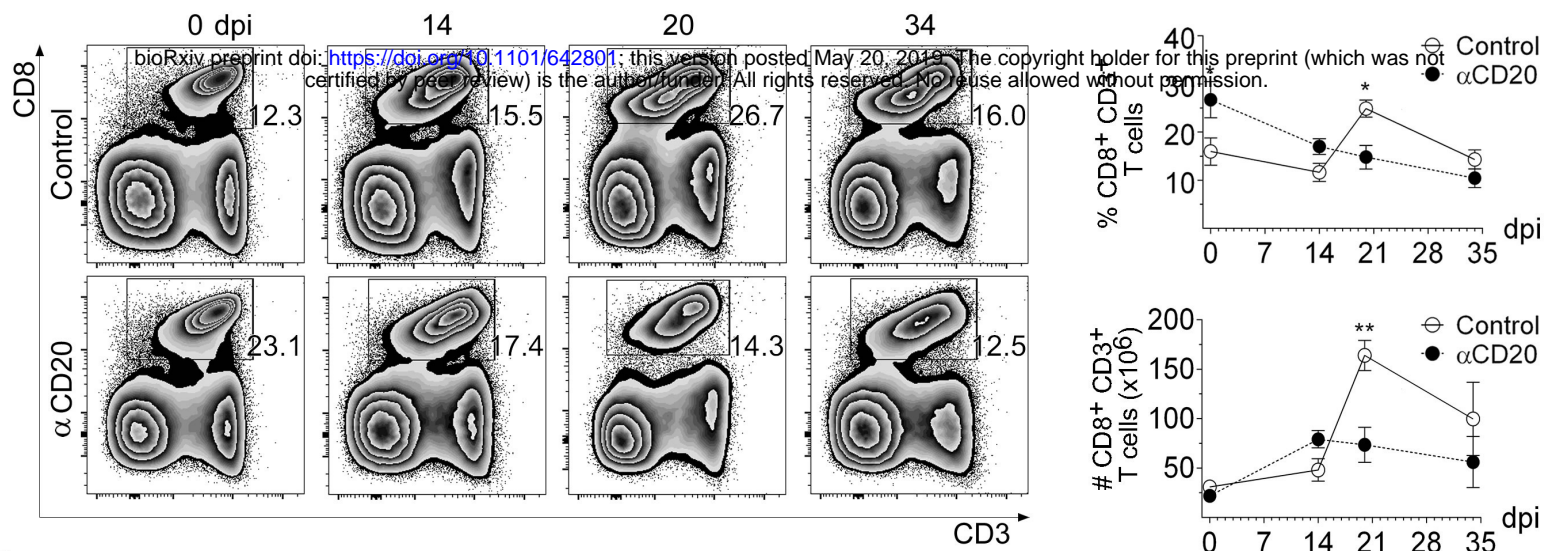

B

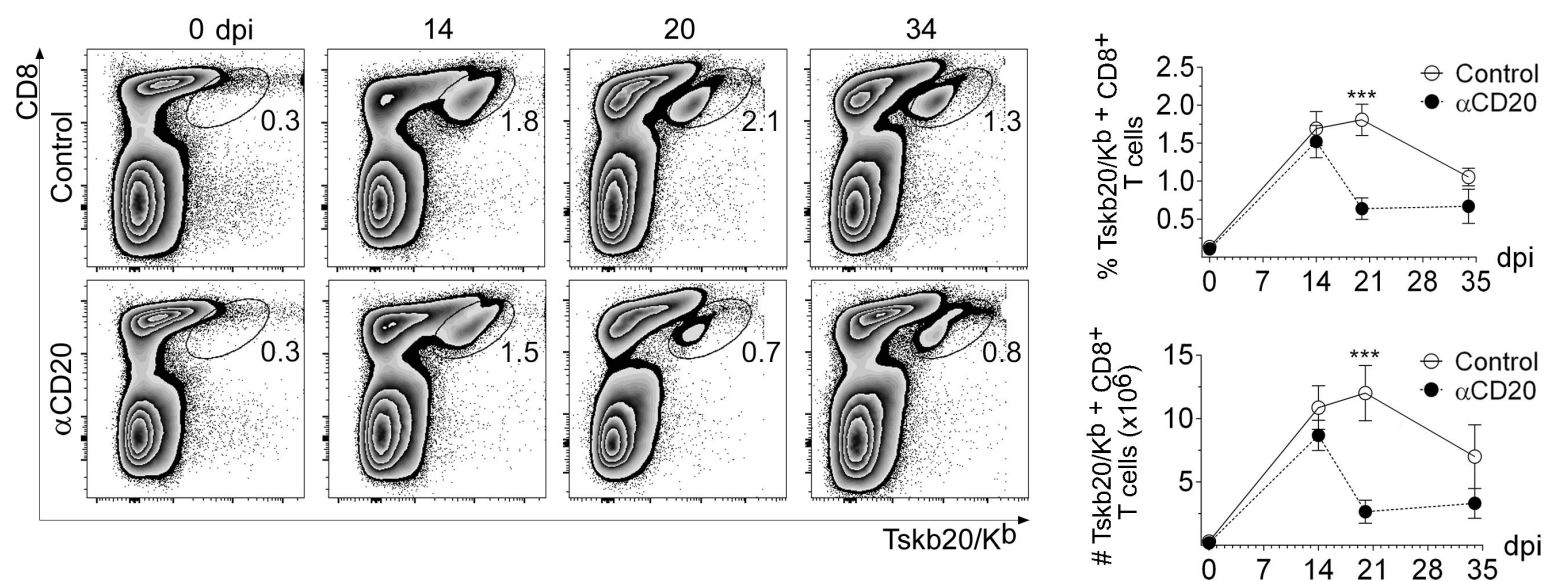

C

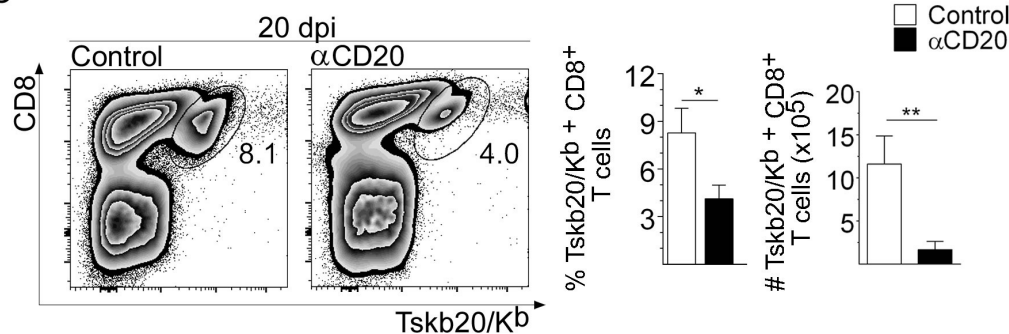

D

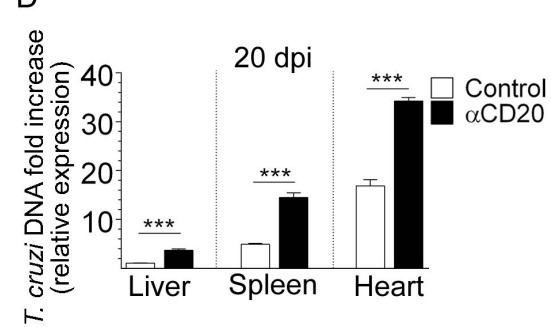

FIGURE 1. Anti-CD20 treatment reduced CD8<sup>+</sup> T cells and increased tissue parasitism. Mice injected with isotype control (control; in white circles) or anti-CD20 (αCD20; in black circles) mAb were infected with 5000 trypomastigotes of *T. cruzi* Tulahuén strain. Representative dot plot and statistical analysis of the mean ± SD of the percentage and number of: (A) CD8<sup>+</sup>CD3<sup>+</sup> T cells and (B) Tskb20/Kb<sup>+</sup>CD8<sup>+</sup> T cells, within the lymphocyte gate, in the spleen from uninfected (day 0) or infected mice at different dpi. (C) Representative plots and statistical analysis of the mean ± SD of the percentage and number of Tskb20/Kb<sup>+</sup>CD8<sup>+</sup> T cells in liver at 20 dpi in control (white bars) or anti-CD20 treated mice (black bars). Numbers within the plots indicate the frequency of cells in each region. N=4-5 mice per group. (D) Relative amount of *T. cruzi* satellite DNA in liver, spleen and heart from infected control and anti-CD20-treated mice determined at 20 dpi. Murine GAPDH was used for normalization. Data are presented as mean ± SD, N=4 mice per group. P values calculated with two tailed T test. Data are representative of four (A-C), and two (D) independent experiments.

Figure 2

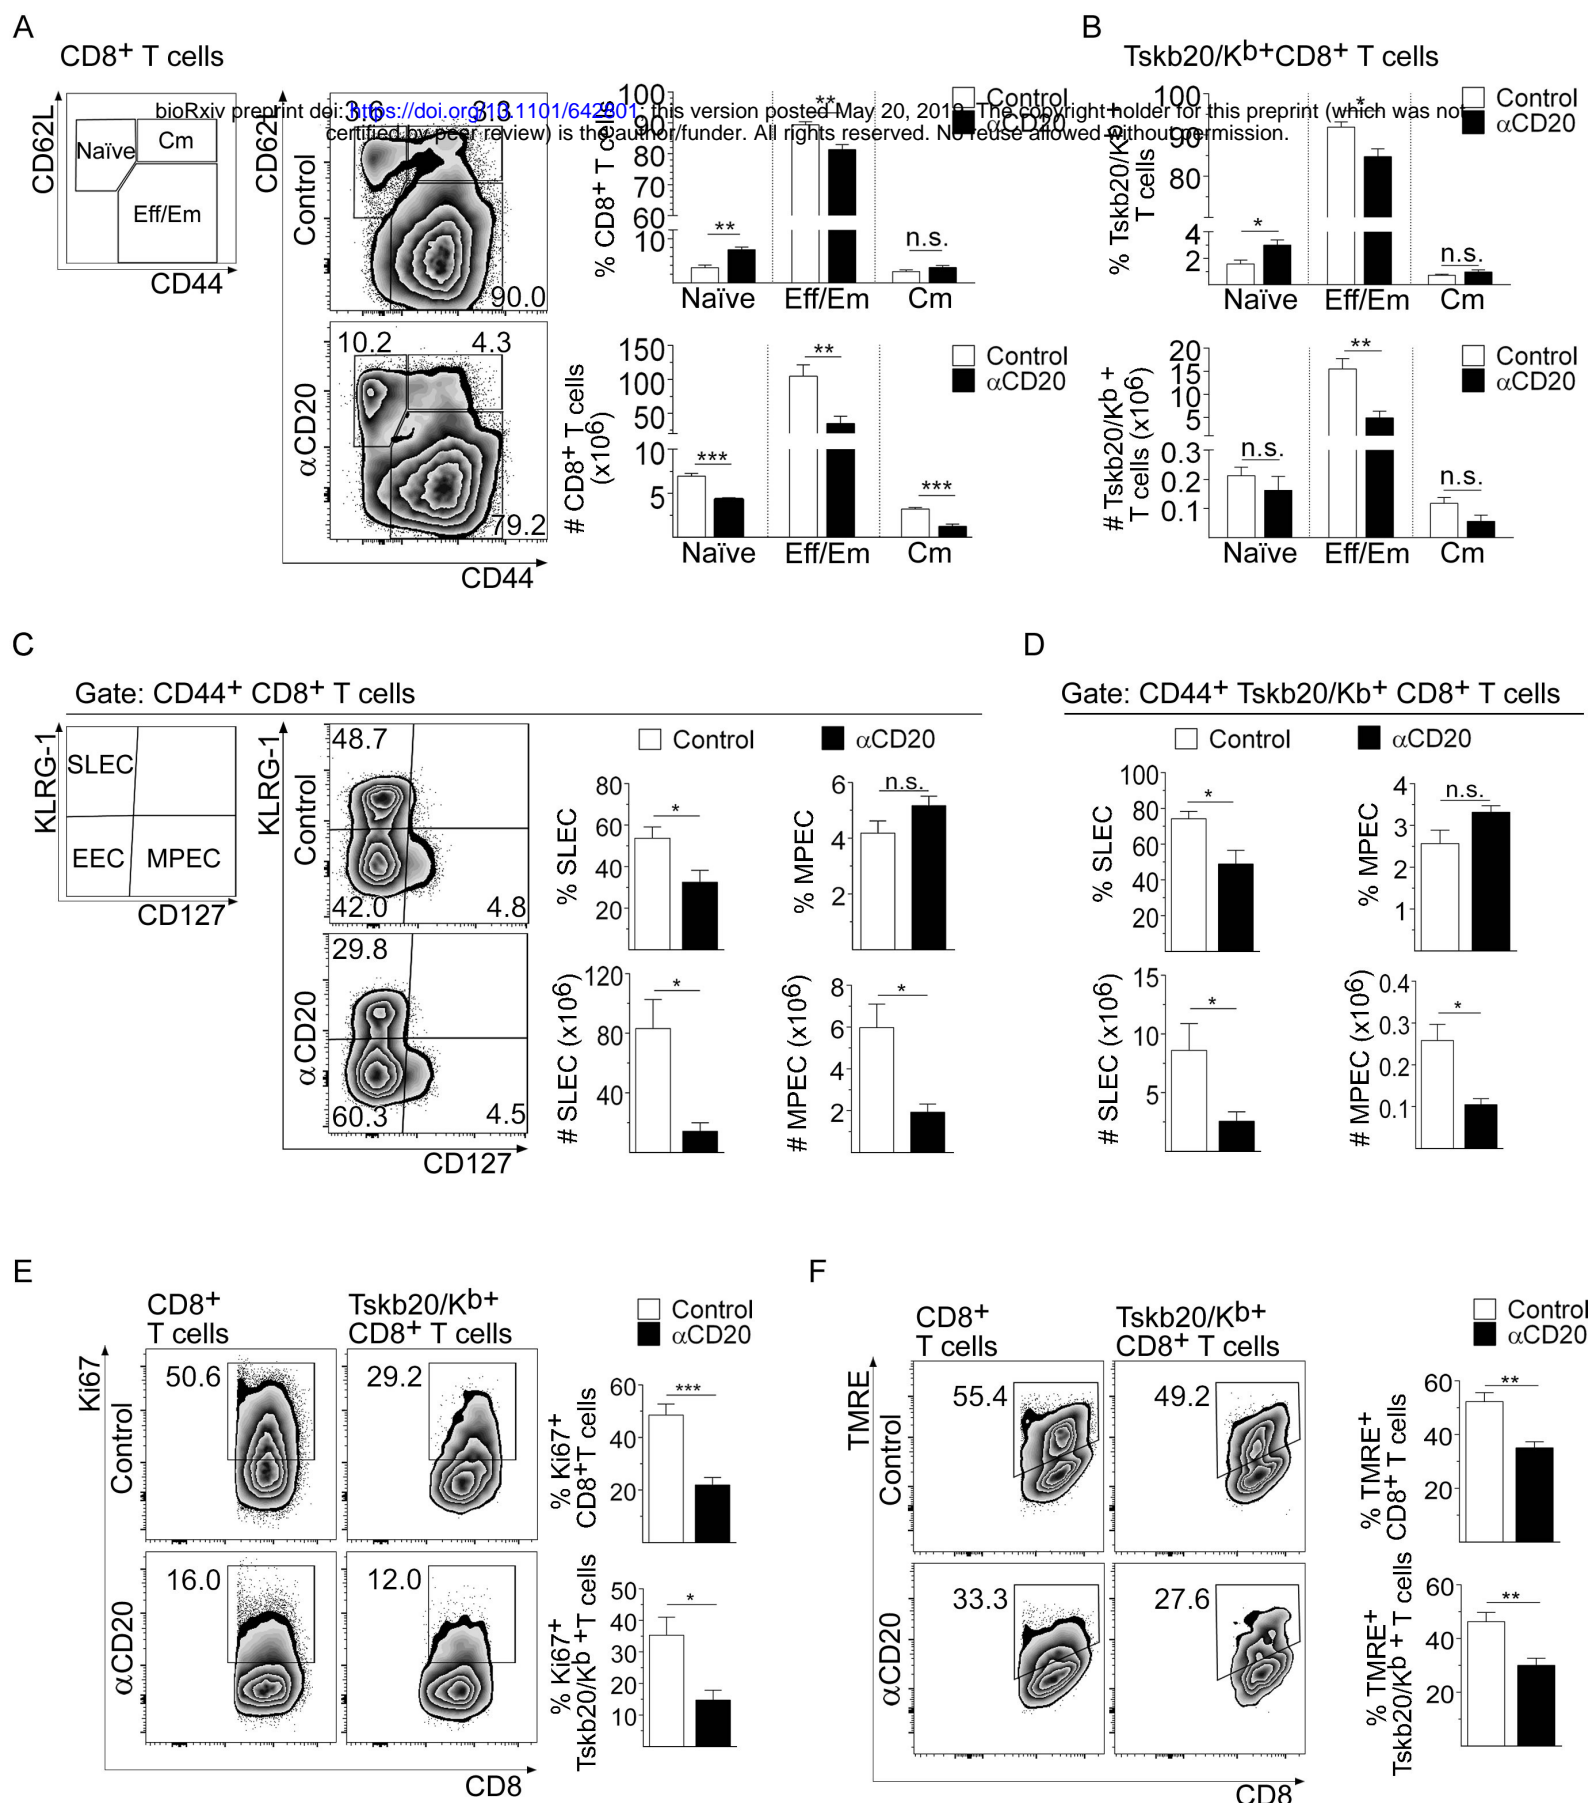

FIGURE 2. Anti-CD20 treatment decreased effector and memory CD8<sup>+</sup> T cell number and compromised their survival and proliferation.

Mice injected with isotype control (control; in white bars) or anti-CD20 ( $\alpha$ CD20; in black bars) mAb were infected with 5000 trypomastigotes of *T. cruzi* Tulahuén strain. Splenic cells were obtained at 20 dpi and analyzed by flow cytometry. (A) Representative plots of CD62L vs CD44 expression on CD8<sup>+</sup> T cells. Statistical analysis of the frequency and number of naïve (CD62L<sup>hi</sup>CD44<sup>lo</sup>), effector memory/effector (CD62L<sup>lo</sup>CD44<sup>hi</sup>) and central memory (CD62L<sup>hi</sup>CD44<sup>hi</sup>) cells of: (A) total CD8<sup>+</sup> and (B) Tskb20/Kb<sup>+</sup>CD8<sup>+</sup> T cells. (C) Representative plots of KLRG-1 vs CD127 expression on CD44<sup>+</sup>CD8<sup>+</sup> T cells. Statistical analysis of the frequency and number of short-lived effector cells (SLEC: KLRG<sup>hi</sup>CD127<sup>lo</sup>) and memory precursor effector cells (MPEC: KLRG<sup>lo</sup>CD127<sup>hi</sup>) of (C) total CD44<sup>+</sup>CD8<sup>+</sup> and (D) CD44<sup>+</sup> Tskb20/Kb<sup>+</sup> CD8<sup>+</sup> T cells. (E) Plots and bar graphs representing the frequency of Ki67<sup>+</sup> cells on gated CD8<sup>+</sup> or Tskb20/Kb<sup>+</sup>CD8<sup>+</sup> T cells. (F) Plots and bar graphs representing the frequency of viable non-apoptotic TMRE<sup>hi</sup> cells on gated CD8<sup>+</sup> or Tskb20/Kb<sup>+</sup>CD8<sup>+</sup> T cells. Numbers within the plots indicate the frequency of cells in each region. Bar graphs represent data as mean  $\pm$  SD, N=4-5 mice. All P values calculated with two-tailed T test. Data are representative of three (A-D) and two (E-F) independent experiments.



Figure 3

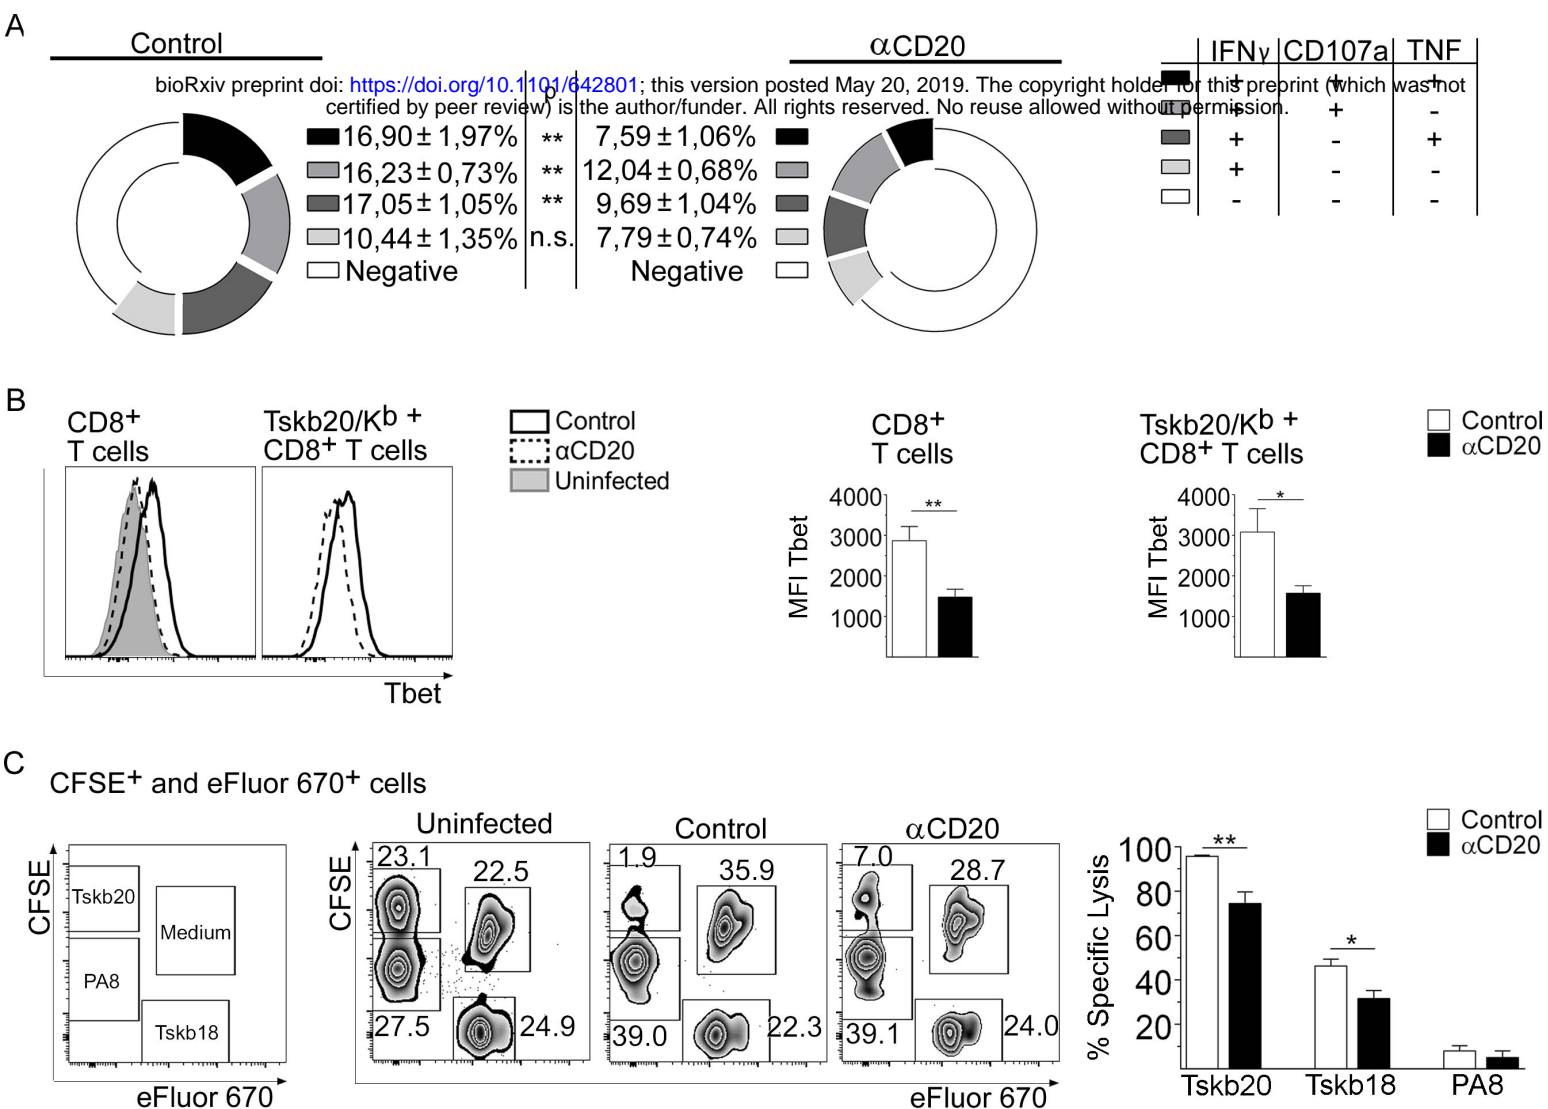

**FIGURE 3: Anti-CD20 treatment resulted in a lower CD8<sup>+</sup> T cell functional activity**  
Mice injected with isotype control (control) or anti-CD20 ( $\alpha$ CD20) mAb were infected with 5000 trypomastigotes of *T. cruzi* Tulahuén strain. Uninfected mice were processed in parallel. Splenic cells were obtained at 20 dpi and analyzed by flow cytometry. (A) Chart pie with the frequency  $\pm$  SD of polyfunctional CD8<sup>+</sup> T cells upon PMA+Ionomycin stimulation. References of the different populations (IFN $\gamma$ +TNF+CD107a+, triple positive; IFN $\gamma$ +TNF+ or IFN $\gamma$ +CD107a+, double positive; IFN $\gamma$ + single positive CD8<sup>+</sup> T cells) are indicated in the table at the right. (B) Representative histograms and statistical analysis of Tbet expression in total and Tskb20/Kb+CD8<sup>+</sup> T cells from infected control (empty solid line) or anti-CD20-treated (empty dashed line) mice or uninfected mice (gray fill solid line). (C) Representative dot plots of the frequency of transferred antigen-pulsed and unpulsed cells in the spleen of uninfected and infected control or anti-CD20-treated mice at 20 dpi (left panel), and statistical analysis of percentage of specific lysis (right panel) in infected control (white bars) or anti-CD20-treated (black bars) mice. N= 5-6 (A-B) and 4-5 (C) mice per group. P values calculated with two tailed T test. Data are representative of three (A-B) and two (C) independent experiments.

Figure 4

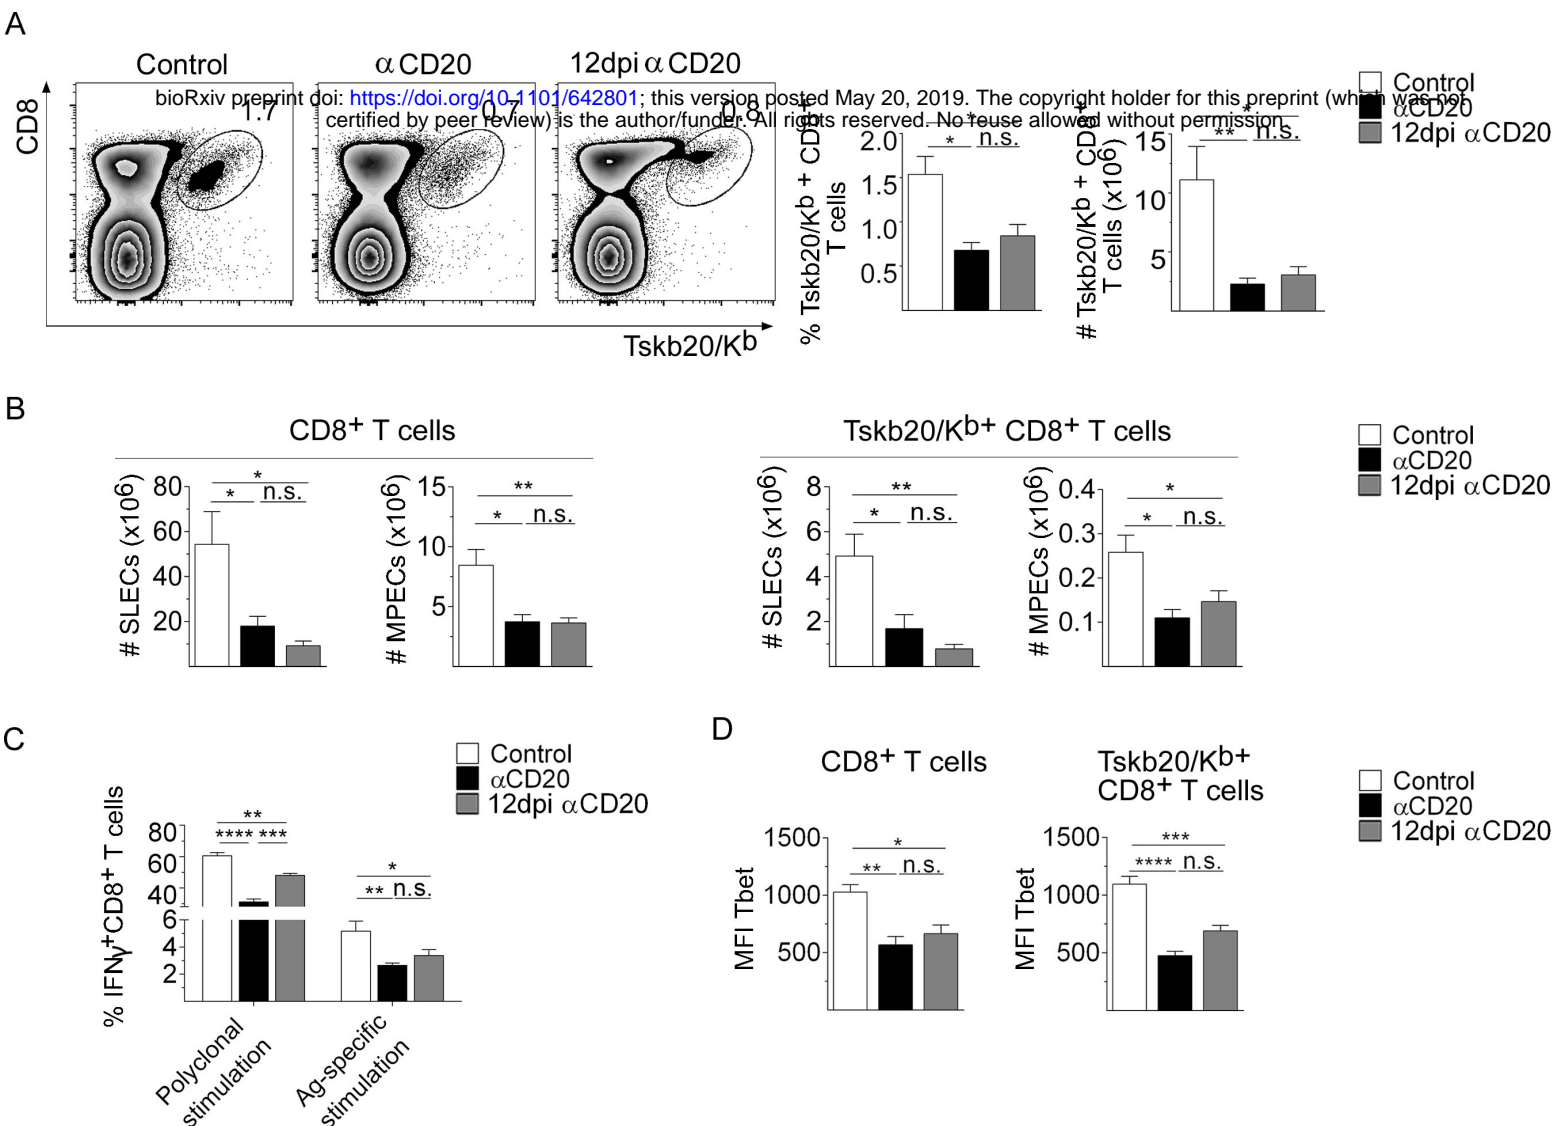

**FIGURE 4.** *T. cruzi* infected mice treated with anti-CD20 mAb at 12 dpi also had a reduced CD8+ T cell response.

Mice infected with 5000 trypomastigotes of *T. cruzi* Tulahuén strain were injected with isotype control (control; white bars) or anti-CD20 mAb at 12 dpi (12dpi  $\alpha$ CD20; gray bars). Mice injected with anti-CD20 mAb 8 days before the infection with 5000 trypomastigotes of *T. cruzi* Tulahuén strain were processed in parallel ( $\alpha$ CD20; black bars). The spleens of the different groups of mice were obtained at 20 dpi. (A) Representative dot plot showing the percentage of Tskb20/Kb+CD8+ T cells, within the lymphocyte gate; and statistical analysis of the mean  $\pm$  SD of the percentages and number of indicated cells. (B) Statistical analysis of the number of SLECs and MPECs in total CD8+ and Tskb20/Kb+CD8+ T cells. (C) Statistical analysis of total IFN $\gamma$ +CD8+ T cell frequency of splenic cells stimulated with PMA+Ionomycin (Polyclonal stimulation) or with Tskb20 (Ag-specific stimulation) after 5h of culture. (D) Statistical analysis of Tbet expression on total and TSKB20/Kb+CD8+ T cells. N= 5-6 (A) and 4-5 (B-D) mice per group. P values were calculated with one-way ANOVA followed by Bonferroni's posttest. Data are representative of three (A) and two (B-D) independent experiments.



Figure 5

A

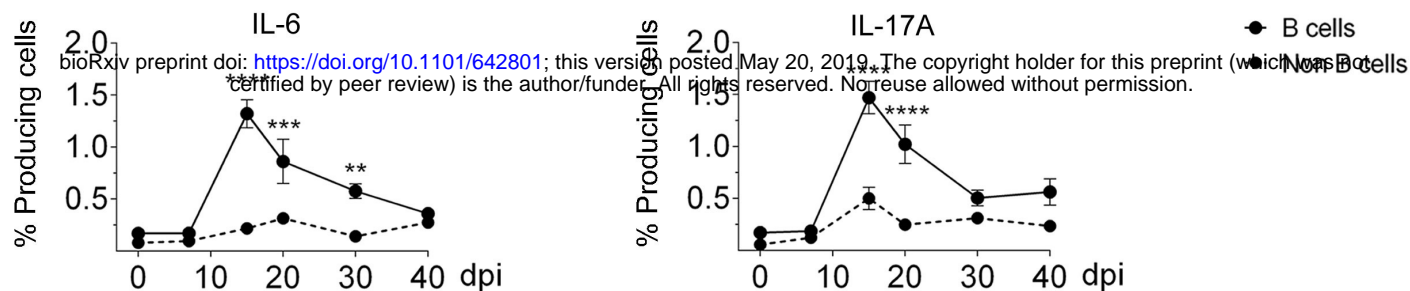

B

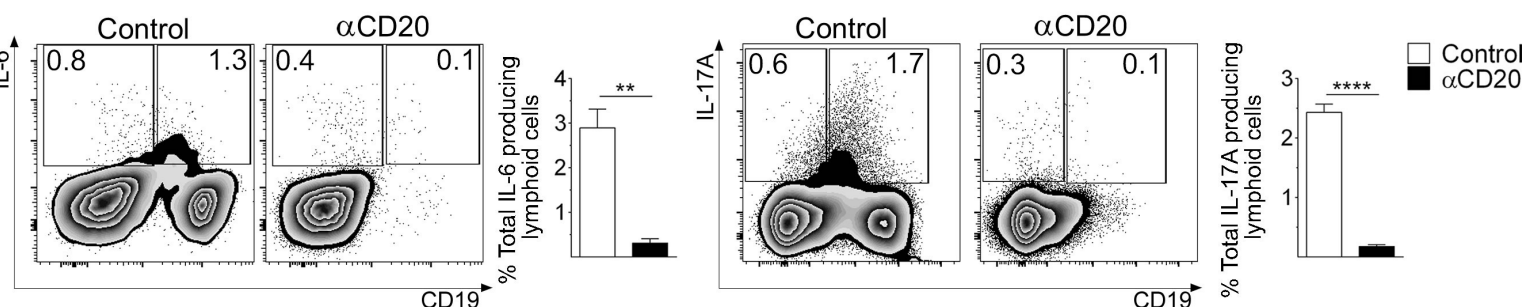

C

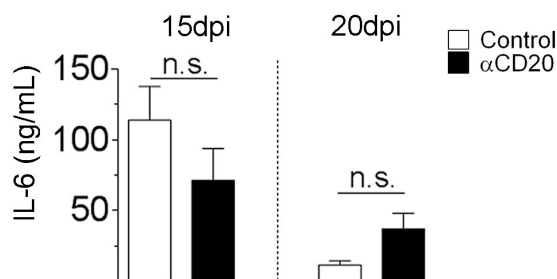

D

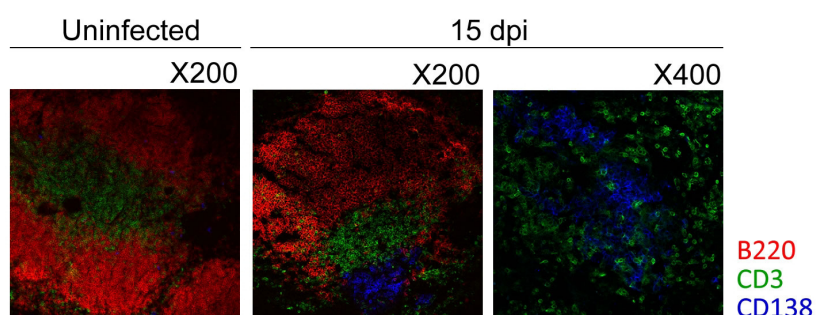

E

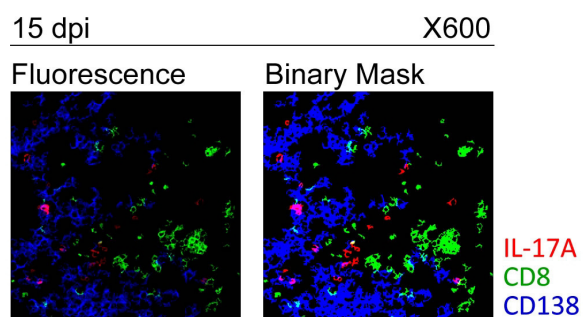

FIGURE 5. Splenic B cells from *T. cruzi* infected mice were the main IL-6 and IL-17A-producing lymphoid cells

(A) C57BL/6 mice were infected with 5000 trypomastigotes of *T. cruzi* Tulahuén strain and analyzed at different dpi. Zero dpi indicates uninfected mice. Statistical analysis of the percentage of IL-6 or IL-17A-producing CD19+ (B) or CD19neg (Non-B) cells within the lymphocyte gate, in the spleen from uninfected (0dpi) or infected mice at different dpi. (B) Representative plots and statistical analysis of IL-6 or IL-17A-producing lymphoid cells at 15 dpi, obtained from infected control (white bars) or anti-CD20-treated (black bars) mice. (C) Serum IL-6 concentration in infected control or  $\alpha$ CD20-treated mice determined at 15 and 20 dpi. (D) Immunofluorescence of spleen sections from uninfected and *T. cruzi* infected mice obtained at 15 dpi, stained with anti-CD3 (green), anti-B220 (red) and anti-CD138 (blue). (E) Immunofluorescence of spleen sections from *T. cruzi* infected mice obtained at 15 dpi, stained with anti-CD8 (green), anti-IL-17A (red) and anti-CD138 (blue). The image on the right represents the binary expression of the positive fluorescence observed in the image on the left. N= 4-5 (A-C) and 3-4 (D-E) mice per group. P values were calculated with two tailed T test. Data are representative of three (A-B) and two (C-E) independent experiments.

Figure 6

A

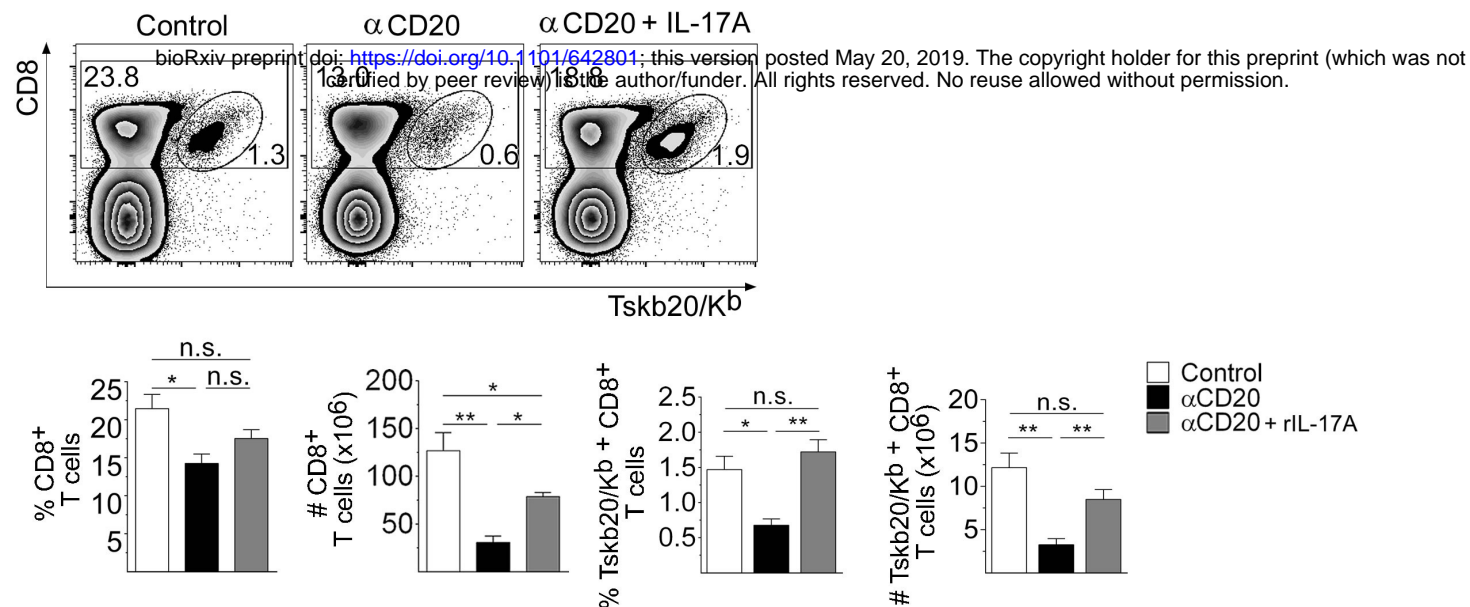

B

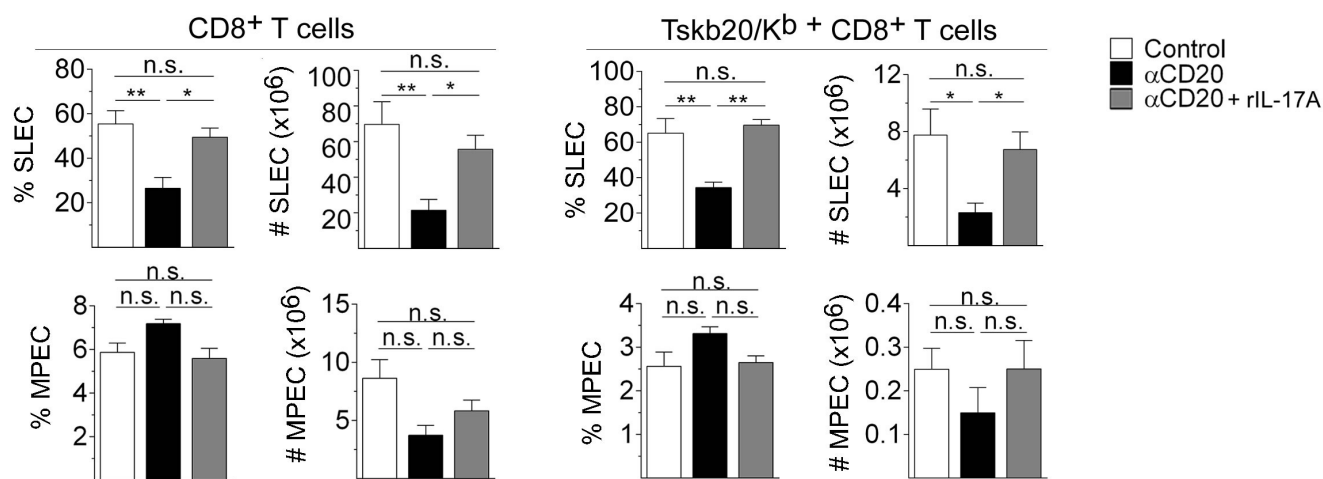

FIGURE 6. IL-17A rescued the magnitude and effector phenotype of the CD8<sup>+</sup> T cell response observed in infected anti-CD20-treated mice

Mice infected with 5000 trypomastigotes of *T. cruzi* Tulahuén strain were injected with isotype control (control; white bars) or anti-CD20 mAb 8 days before infection. Infected mice injected with anti-CD20 mAb were also injected with PBS (αCD20, black bars) or rIL-17A (αCD20 + rIL-17A, gray bars) at 12, 14, 16 and 18 dpi. The spleens of the different groups of mice were obtained at 20 dpi. (A) Representative dot plot showing the percentage of total and TSKB20/Kb+CD8<sup>+</sup> T cells, gated on lymphoid cells; and statistical analysis of the mean ± SD of the percentages and number of indicated cells. (B) Statistical analysis of the number of SLECs and MPECs in total and Tskb20/Kb+-specific CD8<sup>+</sup> T cells. N= 4-5 (A-B) mice per group. P values were calculated with one-way ANOVA followed by Bonferroni's posttest. Data are representative of three independent experiments.

Figure 7

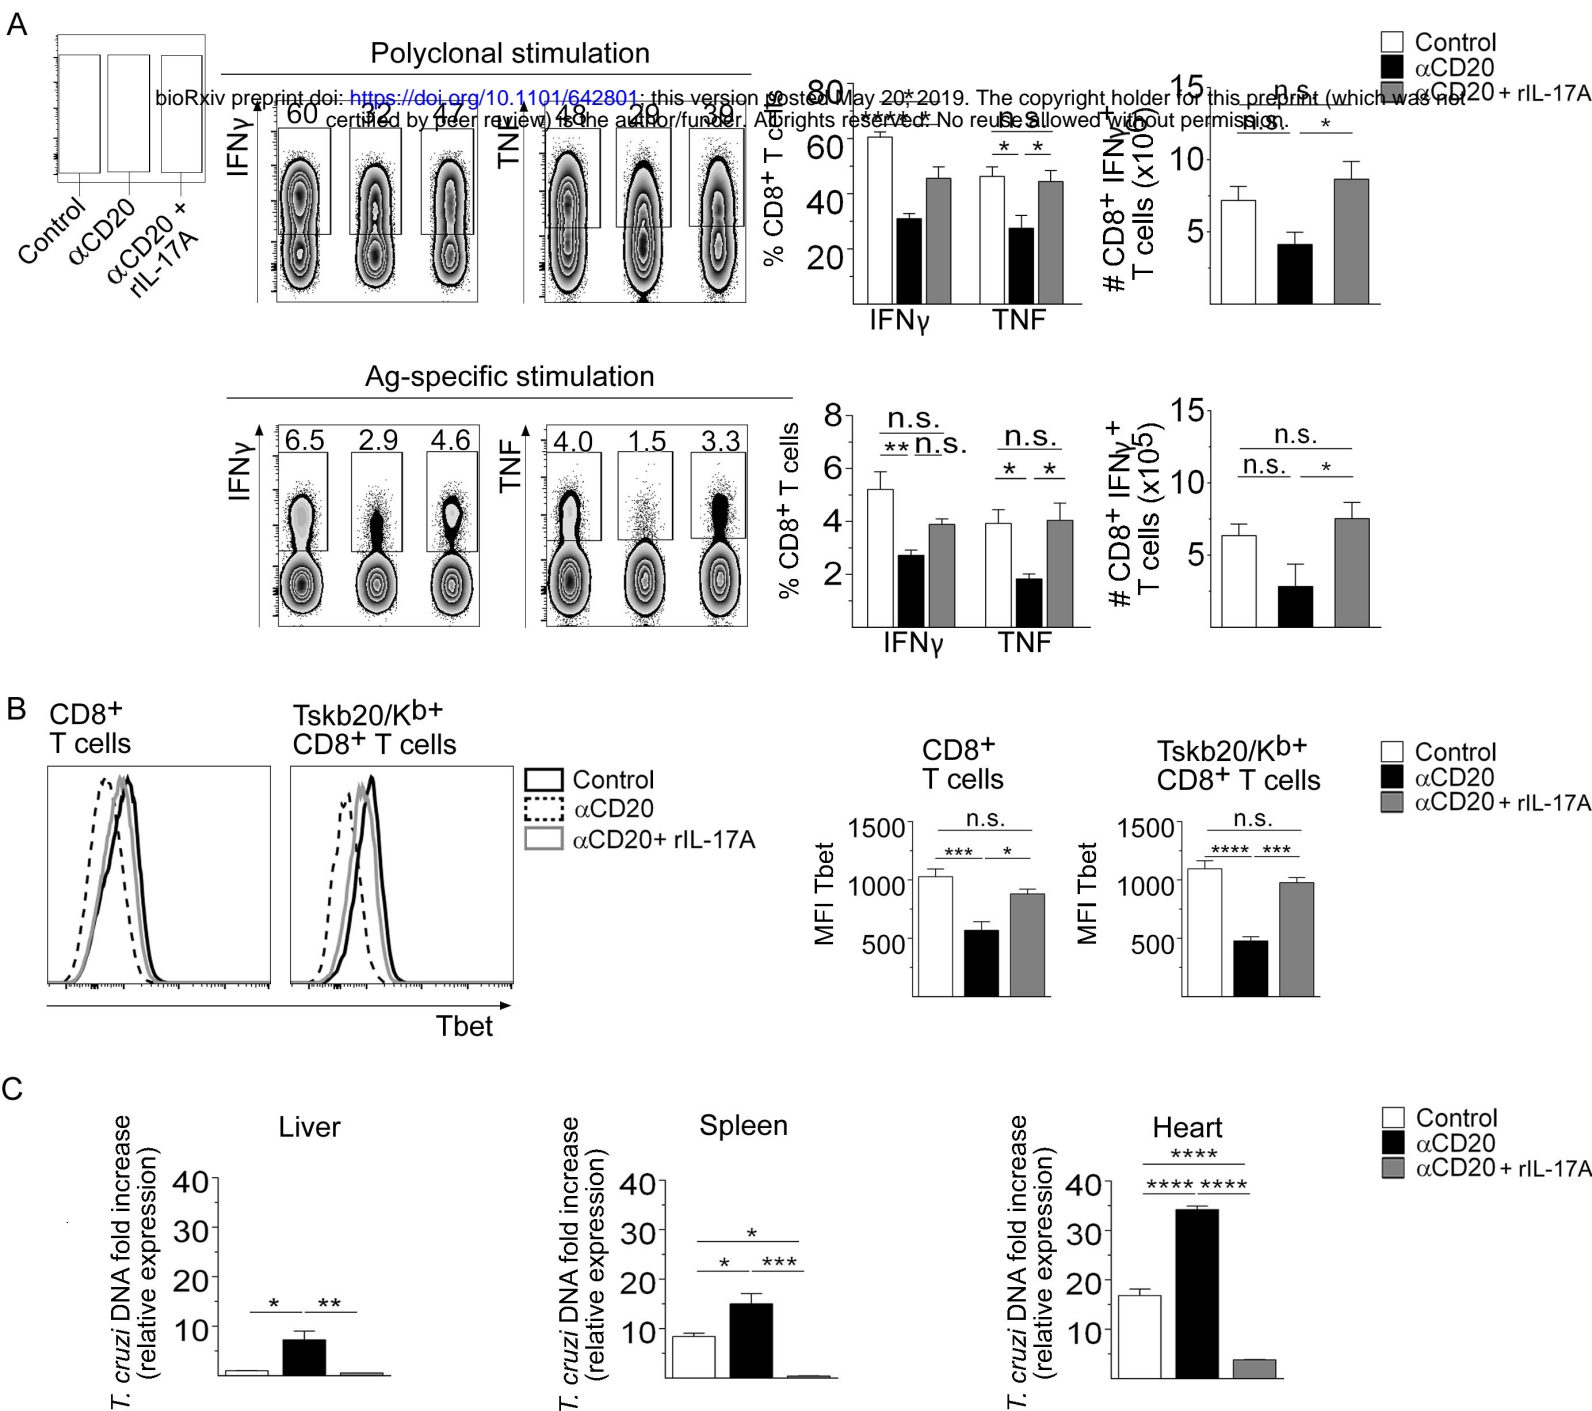

**FIGURE 7. IL-17A increased the functionality of CD8<sup>+</sup> T cells and favored parasite control in infected anti-CD20-treated mice**

Mice infected with 5000 trypomastigotes of *T. cruzi* Tulahuén strain were injected with isotype control (control; white bars) or anti-CD20 mAb 8 days before infection. Infected mice injected with anti-CD20 mAb were injected with PBS (αCD20, black bars) or rIL-17A (αCD20 + rIL-17A, gray bars) at 12, 14, 16 and 18 dpi. The splees of the different groups of mice were obtained at 20 dpi. (A) Representative dot plot and statistical analysis of the percentage and number of IFN $\gamma$ <sup>+</sup> or the percentage TNF<sup>+</sup> cells, gated on CD8<sup>+</sup> T cells, obtained after polyclonal or Ag-specific stimulation. (B) Representative histograms and statistical analysis of Tbet expression in total and Tskb20/Kb<sup>+</sup>CD8<sup>+</sup> T cells from infected control (black solid line) or anti-CD20-treated mice injected with PBS (black dashed line) or with rIL-17A (gray solid line). (C) Relative amount of *T. cruzi* satellite DNA in liver, spleen and heart determined at 20 dpi. Murine GAPDH was used for normalization. N= 5-6 (A-B) and 3-4 (C) mice per group. P values were calculated with one-way ANOVA followed by Bonferroni's posttest. Data are representative of three (A-B) and two (C) independent experiments.



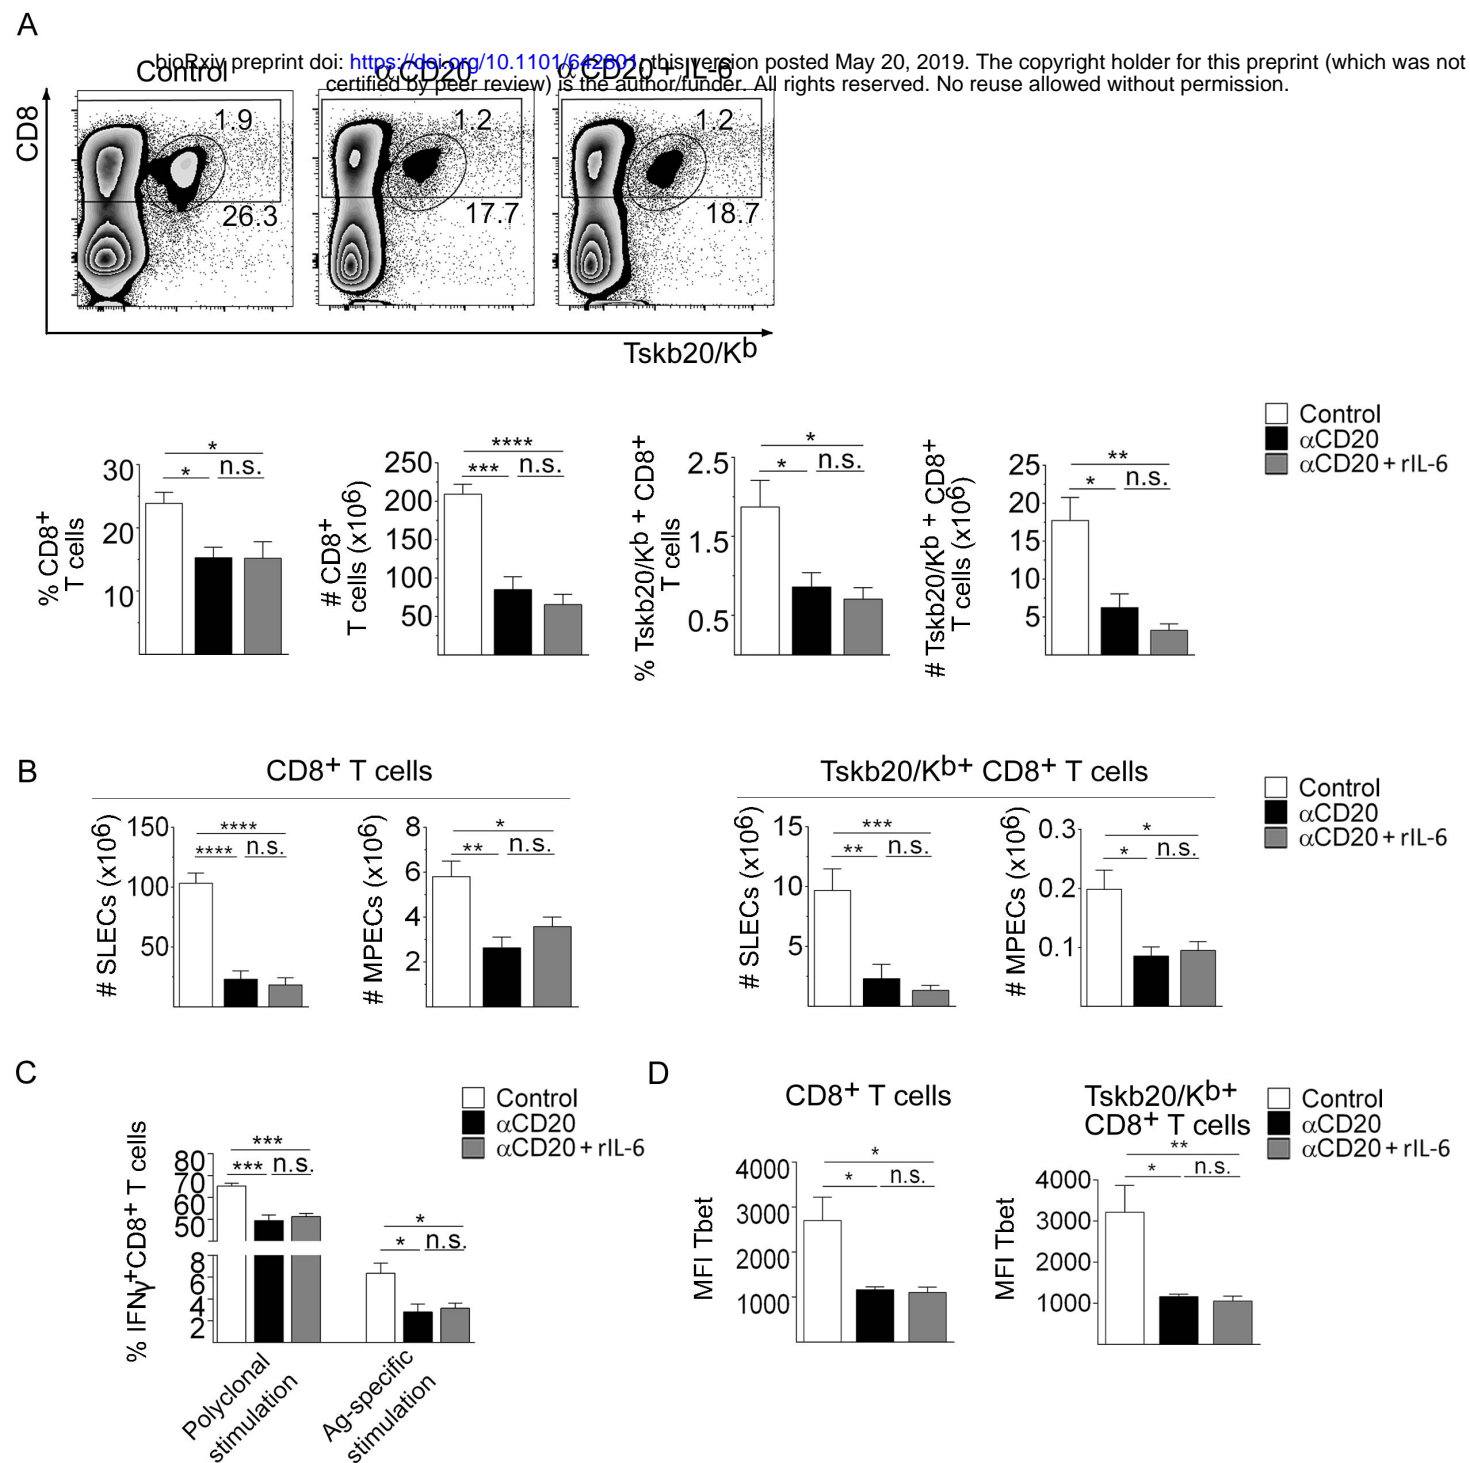

**FIGURE 8.** IL-6 did not modify the magnitude and effector phenotype of the CD8<sup>+</sup> T cell response observed in infected anti-CD20-treated mice

Mice infected with 5000 trypomastigotes of *T. cruzi* Tulahuén strain were injected with isotype control (control; white bars) or anti-CD20 mAb 8 days before infection. Infected mice injected with anti-CD20 mAb were also injected with PBS ( $\alpha$ CD20, black bars) or rIL-6 ( $\alpha$ CD20 + rIL-6, gray bars) at 12, 14, 16 and 18 dpi. The spleens of the different groups of mice were obtained at 20 dpi. (A) Representative dot plot showing the percentage of total and TSKB20/Kb+CD8<sup>+</sup> T cells, gated on lymphoid cells; and statistical analysis of the mean  $\pm$  SD of the percentages and number of indicated cells. (B) Statistical analysis of the number of SLECs and MPECs in total and Tskb20/Kb+-specific CD8<sup>+</sup> T cells. (C) Statistical analysis of total IFN $\gamma$ +CD8<sup>+</sup> T cell frequency of splenic cells stimulated with PMA+Ionomycin (Polyclonal stimulation) or with Tskb20 (Ag-specific stimulation) after 5h of culture. (D) Statistical analysis of Tbet expression on total and TSKB20/Kb+CD8<sup>+</sup> T cells. N= 4-6 (A-D) mice per group. P values were calculated with one-way ANOVA followed by Bonferroni's posttest. Data are representative of two independent experiments
